# Supplementary material for: A Machine Learning Approach to Solve the Network Overload Problem Caused by IoT Devices Spatially Tracked Indoors
Source: MDPI journal article supplement (doi:10.3390/jsan11020029), 2022-06-16
Supplement: s1 [file s1]

# A machine learning approach to solve the network overload problem caused by IoT devices spatially tracked indoors: supplemental material

DANIEL CARVALHO<sup>1</sup>, DANIEL SULLIVAN<sup>1</sup>, RAFAEL ALMEIDA<sup>1</sup> AND CARLOS CAMINHA<sup>1</sup>

<sup>1</sup> Universidade de Fortaleza, Brazil; danielrotheia@edu.unifor.br

<sup>1</sup> Universidade de Fortaleza, Brazil; daniel.sullivan@edu.unifor.br

<sup>1</sup> Universidade de Fortaleza, Brazil; rafael.alm@edu.unifor.br

<sup>1</sup> Universidade de Fortaleza, Brazil; caminha@unifor.br

## 1. METRIC VALUES OBTAINED IN THE EXPERIMENTS

The tables presented in this session represent all the values of  $R^2$ , MAE and RMSE for the experiments performed in the main text of this article. In the Tables 1, 2, 3 and 4 are the values referred to the experiments presented in Figure 4. Each table corresponds to a different environment. In the Tables 5, 6 and 7, are the values referred to the experiments presented in Figure 5. Each table corresponds to a different environment.

## 2. DETAILED ALGORITHMS PARAMETERS

The tables presented in this session details all parameters used in each algorithm in the main text. The Tables 8, 9, 10 and 12 refers to Random Forest algorithm [1], Ada Boost algorithm [2], Decision Tree algorithm (used by Ada Boost) and Histogram Based Gradient Boost [3, 4]. Each one is implemented by *scikit-learn*<sup>1</sup> [5].

The Table 11 refers to XGBoost [6] algorithm, implemented by *xgboost*<sup>2</sup> module.

## REFERENCES

1. L. Breiman, "Random forests," *Mach. learning* **45**, 5–32 (2001).
2. G. Rätsch, T. Onoda, and K.-R. Müller, "Soft margins for adaboost," *Mach. learning* **42**, 287–320 (2001).
3. G. Ke, Q. Meng, T. Finley, T. Wang, W. Chen, W. Ma, Q. Ye, and T.-Y. Liu, "Lightgbm: A highly efficient gradient boosting decision tree," *Adv. neural information processing systems* **30**, 3146–3154 (2017).
4. J. H. Friedman, "Greedy function approximation: a gradient boosting machine," *Annals statistics* pp. 1189–1232 (2001).
5. F. Pedregosa, G. Varoquaux, A. Gramfort, V. Michel, B. Thirion, O. Grisel, M. Blondel, P. Prettenhofer, R. Weiss, V. Dubourg, J. Vanderplas, A. Passos, D. Cournapeau, M. Brucher, M. Perrot, and E. Duchesnay, "Scikit-learn: Machine learning in Python," *J. Mach. Learn. Res.* **12**, 2825–2830 (2011).
6. T. Chen, T. He, M. Benesty, V. Khotilovich, Y. Tang, H. Cho *et al.*, "Xgboost: extreme gradient boosting," *R package version 0.4-2* **1**, 1–4 (2015).

---

<sup>1</sup><https://scikit-learn.org/stable/modules/classes.html#module-sklearn.ensemble>

<sup>2</sup>[https://xgboost.readthedocs.io/en/stable/python/python\\_intro.html](https://xgboost.readthedocs.io/en/stable/python/python_intro.html)

|     | Linear Interpolation |                    |                    | Hist Based Gradient Boost |                    |                    | Random Forest   |                    |                    |
|-----|----------------------|--------------------|--------------------|---------------------------|--------------------|--------------------|-----------------|--------------------|--------------------|
| $d$ | $R^2$                | $MAE$              | $RMSE$             | $R^2$                     | $MAE$              | $RMSE$             | $R^2$           | $MAE$              | $RMSE$             |
| 1   | 0.998 $\pm$ 0        | 1.574 $\pm$ 0      | 3.025 $\pm$ 0      | 0.999 $\pm$ 0.0           | 1.568 $\pm$ 0.01   | 2.809 $\pm$ 0.012  | 0.999 $\pm$ 0.0 | 1.515 $\pm$ 0.027  | 3.207 $\pm$ 0.161  |
| 2   | 0.998 $\pm$ 0        | 2.066 $\pm$ 0      | 3.771 $\pm$ 0      | 0.999 $\pm$ 0.0           | 1.72 $\pm$ 0.007   | 3.083 $\pm$ 0.009  | 0.999 $\pm$ 0.0 | 1.713 $\pm$ 0.025  | 3.468 $\pm$ 0.11   |
| 3   | 0.997 $\pm$ 0        | 2.699 $\pm$ 0      | 4.787 $\pm$ 0      | 0.999 $\pm$ 0.0           | 1.915 $\pm$ 0.006  | 3.459 $\pm$ 0.013  | 0.999 $\pm$ 0.0 | 1.98 $\pm$ 0.024   | 3.835 $\pm$ 0.113  |
| 4   | 0.995 $\pm$ 0        | 3.475 $\pm$ 0      | 6.03 $\pm$ 0       | 0.999 $\pm$ 0.0           | 2.135 $\pm$ 0.006  | 3.915 $\pm$ 0.025  | 0.998 $\pm$ 0.0 | 2.208 $\pm$ 0.018  | 4.213 $\pm$ 0.059  |
| 5   | 0.992 $\pm$ 0        | 4.374 $\pm$ 0      | 7.448 $\pm$ 0      | 0.998 $\pm$ 0.0           | 2.373 $\pm$ 0.008  | 4.401 $\pm$ 0.027  | 0.998 $\pm$ 0.0 | 2.43 $\pm$ 0.018   | 4.573 $\pm$ 0.054  |
| 6   | 0.989 $\pm$ 0        | 5.388 $\pm$ 0      | 9.002 $\pm$ 0      | 0.998 $\pm$ 0.0           | 2.614 $\pm$ 0.011  | 4.852 $\pm$ 0.031  | 0.998 $\pm$ 0.0 | 2.743 $\pm$ 0.029  | 5.217 $\pm$ 0.09   |
| 7   | 0.986 $\pm$ 0        | 6.504 $\pm$ 0      | 10.666 $\pm$ 0     | 0.997 $\pm$ 0.0           | 2.901 $\pm$ 0.01   | 5.473 $\pm$ 0.031  | 0.997 $\pm$ 0.0 | 2.959 $\pm$ 0.021  | 5.618 $\pm$ 0.051  |
| 8   | 0.982 $\pm$ 0        | 7.716 $\pm$ 0      | 12.422 $\pm$ 0     | 0.997 $\pm$ 0.0           | 3.18 $\pm$ 0.01    | 6.053 $\pm$ 0.031  | 0.997 $\pm$ 0.0 | 3.194 $\pm$ 0.024  | 6.109 $\pm$ 0.067  |
| 9   | 0.978 $\pm$ 0        | 9.02 $\pm$ 0       | 14.254 $\pm$ 0     | 0.996 $\pm$ 0.0           | 3.504 $\pm$ 0.009  | 6.729 $\pm$ 0.029  | 0.996 $\pm$ 0.0 | 3.455 $\pm$ 0.034  | 6.828 $\pm$ 0.11   |
| 10  | 0.973 $\pm$ 0        | 10.391 $\pm$ 0     | 16.139 $\pm$ 0     | 0.996 $\pm$ 0.0           | 3.801 $\pm$ 0.016  | 7.39 $\pm$ 0.039   | 0.996 $\pm$ 0.0 | 3.711 $\pm$ 0.018  | 7.329 $\pm$ 0.057  |
| 11  | 0.967 $\pm$ 0        | 11.845 $\pm$ 0     | 18.088 $\pm$ 0     | 0.995 $\pm$ 0.0           | 4.176 $\pm$ 0.022  | 8.09 $\pm$ 0.05    | 0.995 $\pm$ 0.0 | 3.943 $\pm$ 0.026  | 7.85 $\pm$ 0.047   |
| 12  | 0.961 $\pm$ 0        | 13.372 $\pm$ 0     | 20.086 $\pm$ 0     | 0.994 $\pm$ 0.0           | 4.5 $\pm$ 0.022    | 8.751 $\pm$ 0.04   | 0.994 $\pm$ 0.0 | 4.246 $\pm$ 0.025  | 8.453 $\pm$ 0.066  |
| 13  | 0.954 $\pm$ 0        | 14.965 $\pm$ 0     | 22.128 $\pm$ 0     | 0.993 $\pm$ 0.0           | 4.832 $\pm$ 0.021  | 9.413 $\pm$ 0.053  | 0.994 $\pm$ 0.0 | 4.49 $\pm$ 0.022   | 9.014 $\pm$ 0.061  |
| 14  | 0.947 $\pm$ 0        | 16.62 $\pm$ 0      | 24.207 $\pm$ 0     | 0.992 $\pm$ 0.0           | 5.235 $\pm$ 0.025  | 10.258 $\pm$ 0.065 | 0.993 $\pm$ 0.0 | 4.798 $\pm$ 0.018  | 9.69 $\pm$ 0.043   |
| 15  | 0.938 $\pm$ 0        | 18.332 $\pm$ 0     | 26.32 $\pm$ 0      | 0.99 $\pm$ 0.0            | 5.701 $\pm$ 0.025  | 11.101 $\pm$ 0.063 | 0.992 $\pm$ 0.0 | 5.097 $\pm$ 0.02   | 10.318 $\pm$ 0.038 |
| 16  | 0.929 $\pm$ 0        | 20.089 $\pm$ 0     | 28.46 $\pm$ 0      | 0.989 $\pm$ 0.0           | 6.118 $\pm$ 0.027  | 11.907 $\pm$ 0.075 | 0.991 $\pm$ 0.0 | 5.402 $\pm$ 0.023  | 10.967 $\pm$ 0.059 |
| 17  | 0.92 $\pm$ 0         | 21.882 $\pm$ 0     | 30.622 $\pm$ 0     | 0.987 $\pm$ 0.0           | 6.5 $\pm$ 0.034    | 12.643 $\pm$ 0.082 | 0.99 $\pm$ 0.0  | 5.702 $\pm$ 0.024  | 11.624 $\pm$ 0.039 |
| 18  | 0.909 $\pm$ 0        | 23.706 $\pm$ 0     | 32.799 $\pm$ 0     | 0.986 $\pm$ 0.0           | 6.965 $\pm$ 0.027  | 13.516 $\pm$ 0.052 | 0.988 $\pm$ 0.0 | 6.032 $\pm$ 0.026  | 12.352 $\pm$ 0.05  |
| 19  | 0.897 $\pm$ 0        | 25.554 $\pm$ 0     | 34.985 $\pm$ 0     | 0.984 $\pm$ 0.0           | 7.402 $\pm$ 0.046  | 14.255 $\pm$ 0.096 | 0.987 $\pm$ 0.0 | 6.387 $\pm$ 0.024  | 13.091 $\pm$ 0.051 |
| 20  | 0.885 $\pm$ 0        | 27.407 $\pm$ 0     | 37.182 $\pm$ 0     | 0.982 $\pm$ 0.0           | 7.909 $\pm$ 0.039  | 15.049 $\pm$ 0.079 | 0.985 $\pm$ 0.0 | 6.743 $\pm$ 0.025  | 13.772 $\pm$ 0.034 |
| 21  | 0.872 $\pm$ 0        | 29.244 $\pm$ 0     | 39.376 $\pm$ 0     | 0.98 $\pm$ 0.0            | 8.449 $\pm$ 0.035  | 15.878 $\pm$ 0.061 | 0.984 $\pm$ 0.0 | 7.093 $\pm$ 0.027  | 14.461 $\pm$ 0.049 |
| 22  | 0.858 $\pm$ 0        | 31.058 $\pm$ 0     | 41.562 $\pm$ 0     | 0.978 $\pm$ 0.0           | 8.949 $\pm$ 0.053  | 16.74 $\pm$ 0.124  | 0.982 $\pm$ 0.0 | 7.477 $\pm$ 0.024  | 15.207 $\pm$ 0.041 |
| 23  | 0.843 $\pm$ 0        | 32.854 $\pm$ 0     | 43.733 $\pm$ 0     | 0.975 $\pm$ 0.0           | 9.502 $\pm$ 0.039  | 17.622 $\pm$ 0.097 | 0.98 $\pm$ 0.0  | 7.861 $\pm$ 0.02   | 15.924 $\pm$ 0.038 |
| 24  | 0.828 $\pm$ 0        | 34.629 $\pm$ 0     | 45.886 $\pm$ 0     | 0.973 $\pm$ 0.0           | 9.981 $\pm$ 0.043  | 18.521 $\pm$ 0.103 | 0.978 $\pm$ 0.0 | 8.272 $\pm$ 0.019  | 16.706 $\pm$ 0.033 |
| 25  | 0.812 $\pm$ 0        | 36.374 $\pm$ 0     | 48.016 $\pm$ 0     | 0.971 $\pm$ 0.0           | 10.528 $\pm$ 0.056 | 19.35 $\pm$ 0.104  | 0.976 $\pm$ 0.0 | 8.697 $\pm$ 0.021  | 17.607 $\pm$ 0.034 |
| 26  | 0.795 $\pm$ 0        | 38.081 $\pm$ 0     | 50.117 $\pm$ 0     | 0.968 $\pm$ 0.0           | 11.047 $\pm$ 0.049 | 20.223 $\pm$ 0.088 | 0.974 $\pm$ 0.0 | 9.089 $\pm$ 0.026  | 18.371 $\pm$ 0.034 |
| 27  | 0.779 $\pm$ 0        | 39.748 $\pm$ 0     | 52.187 $\pm$ 0     | 0.966 $\pm$ 0.0           | 11.536 $\pm$ 0.05  | 20.94 $\pm$ 0.111  | 0.972 $\pm$ 0.0 | 9.466 $\pm$ 0.021  | 19.076 $\pm$ 0.032 |
| 28  | 0.762 $\pm$ 0        | 41.374 $\pm$ 0     | 54.223 $\pm$ 0     | 0.963 $\pm$ 0.0           | 12.131 $\pm$ 0.06  | 21.877 $\pm$ 0.092 | 0.97 $\pm$ 0.0  | 9.849 $\pm$ 0.02   | 19.855 $\pm$ 0.039 |
| 29  | 0.745 $\pm$ 0        | 42.96 $\pm$ 0      | 56.223 $\pm$ 0     | 0.96 $\pm$ 0.0            | 12.58 $\pm$ 0.082  | 22.638 $\pm$ 0.114 | 0.967 $\pm$ 0.0 | 10.263 $\pm$ 0.019 | 20.592 $\pm$ 0.028 |
| 30  | 0.727 $\pm$ 0        | 44.507 $\pm$ 0     | 58.187 $\pm$ 0     | 0.957 $\pm$ 0.001         | 13.171 $\pm$ 0.068 | 23.557 $\pm$ 0.111 | 0.965 $\pm$ 0.0 | 10.657 $\pm$ 0.023 | 21.262 $\pm$ 0.039 |
|     | Neural Network (MLP) |                    |                    | Ada Boost                 |                    |                    | XGBoost         |                    |                    |
| $d$ | $R^2$                | $MAE$              | $RMSE$             | $R^2$                     | $MAE$              | $RMSE$             | $R^2$           | $MAE$              | $RMSE$             |
| 1   | 0.999 $\pm$ 0.0      | 1.792 $\pm$ 0.098  | 3.097 $\pm$ 0.161  | 0.999 $\pm$ 0.0           | 1.309 $\pm$ 0.002  | 2.673 $\pm$ 0.009  | 0.999 $\pm$ 0   | 1.484 $\pm$ 0      | 2.748 $\pm$ 0      |
| 2   | 0.999 $\pm$ 0.0      | 2.075 $\pm$ 0.044  | 3.424 $\pm$ 0.053  | 0.999 $\pm$ 0.0           | 1.476 $\pm$ 0.001  | 3.006 $\pm$ 0.004  | 0.999 $\pm$ 0   | 1.709 $\pm$ 0      | 3.112 $\pm$ 0      |
| 3   | 0.998 $\pm$ 0.0      | 2.411 $\pm$ 0.061  | 3.925 $\pm$ 0.073  | 0.999 $\pm$ 0.0           | 1.667 $\pm$ 0.002  | 3.413 $\pm$ 0.005  | 0.999 $\pm$ 0   | 1.917 $\pm$ 0      | 3.48 $\pm$ 0       |
| 4   | 0.998 $\pm$ 0.0      | 2.521 $\pm$ 0.098  | 4.236 $\pm$ 0.107  | 0.999 $\pm$ 0.0           | 1.869 $\pm$ 0.002  | 3.928 $\pm$ 0.01   | 0.999 $\pm$ 0   | 2.147 $\pm$ 0      | 3.895 $\pm$ 0      |
| 5   | 0.998 $\pm$ 0.0      | 2.884 $\pm$ 0.099  | 4.879 $\pm$ 0.107  | 0.998 $\pm$ 0.0           | 2.079 $\pm$ 0.005  | 4.459 $\pm$ 0.019  | 0.998 $\pm$ 0   | 2.366 $\pm$ 0      | 4.362 $\pm$ 0      |
| 6   | 0.998 $\pm$ 0.0      | 3.039 $\pm$ 0.105  | 5.292 $\pm$ 0.119  | 0.998 $\pm$ 0.0           | 2.289 $\pm$ 0.005  | 5.025 $\pm$ 0.014  | 0.998 $\pm$ 0   | 2.61 $\pm$ 0       | 4.845 $\pm$ 0      |
| 7   | 0.997 $\pm$ 0.0      | 3.341 $\pm$ 0.08   | 5.876 $\pm$ 0.097  | 0.997 $\pm$ 0.0           | 2.514 $\pm$ 0.004  | 5.646 $\pm$ 0.015  | 0.998 $\pm$ 0   | 2.867 $\pm$ 0      | 5.43 $\pm$ 0       |
| 8   | 0.997 $\pm$ 0.0      | 3.46 $\pm$ 0.073   | 6.291 $\pm$ 0.09   | 0.997 $\pm$ 0.0           | 2.745 $\pm$ 0.005  | 6.302 $\pm$ 0.018  | 0.997 $\pm$ 0   | 3.125 $\pm$ 0      | 5.975 $\pm$ 0      |
| 9   | 0.996 $\pm$ 0.0      | 3.817 $\pm$ 0.092  | 6.974 $\pm$ 0.105  | 0.996 $\pm$ 0.0           | 2.977 $\pm$ 0.006  | 6.92 $\pm$ 0.017   | 0.996 $\pm$ 0   | 3.395 $\pm$ 0      | 6.576 $\pm$ 0      |
| 10  | 0.996 $\pm$ 0.0      | 3.908 $\pm$ 0.126  | 7.41 $\pm$ 0.109   | 0.995 $\pm$ 0.0           | 3.168 $\pm$ 0.006  | 7.631 $\pm$ 0.017  | 0.996 $\pm$ 0   | 3.674 $\pm$ 0      | 7.226 $\pm$ 0      |
| 11  | 0.995 $\pm$ 0.0      | 4.415 $\pm$ 0.169  | 8.221 $\pm$ 0.145  | 0.994 $\pm$ 0.0           | 3.395 $\pm$ 0.007  | 8.337 $\pm$ 0.022  | 0.995 $\pm$ 0   | 3.976 $\pm$ 0      | 7.874 $\pm$ 0      |
| 12  | 0.994 $\pm$ 0.0      | 4.528 $\pm$ 0.108  | 8.713 $\pm$ 0.086  | 0.993 $\pm$ 0.0           | 3.646 $\pm$ 0.009  | 8.985 $\pm$ 0.027  | 0.994 $\pm$ 0   | 4.274 $\pm$ 0      | 8.497 $\pm$ 0      |
| 13  | 0.993 $\pm$ 0.0      | 4.84 $\pm$ 0.072   | 9.418 $\pm$ 0.07   | 0.992 $\pm$ 0.0           | 3.936 $\pm$ 0.008  | 9.794 $\pm$ 0.028  | 0.993 $\pm$ 0   | 4.611 $\pm$ 0      | 9.164 $\pm$ 0      |
| 14  | 0.992 $\pm$ 0.0      | 5.192 $\pm$ 0.097  | 10.12 $\pm$ 0.083  | 0.99 $\pm$ 0.0            | 4.307 $\pm$ 0.01   | 10.769 $\pm$ 0.03  | 0.992 $\pm$ 0   | 4.969 $\pm$ 0      | 9.913 $\pm$ 0      |
| 15  | 0.991 $\pm$ 0.0      | 5.511 $\pm$ 0.149  | 10.836 $\pm$ 0.099 | 0.989 $\pm$ 0.0           | 4.623 $\pm$ 0.012  | 11.642 $\pm$ 0.039 | 0.991 $\pm$ 0   | 5.332 $\pm$ 0      | 10.71 $\pm$ 0      |
| 16  | 0.989 $\pm$ 0.0      | 5.826 $\pm$ 0.14   | 11.579 $\pm$ 0.09  | 0.987 $\pm$ 0.0           | 4.919 $\pm$ 0.013  | 12.612 $\pm$ 0.037 | 0.989 $\pm$ 0   | 5.697 $\pm$ 0      | 11.559 $\pm$ 0     |
| 17  | 0.988 $\pm$ 0.0      | 6.216 $\pm$ 0.092  | 12.415 $\pm$ 0.066 | 0.986 $\pm$ 0.0           | 5.184 $\pm$ 0.018  | 13.193 $\pm$ 0.058 | 0.988 $\pm$ 0   | 6.087 $\pm$ 0      | 12.271 $\pm$ 0     |
| 18  | 0.986 $\pm$ 0.0      | 6.416 $\pm$ 0.149  | 13.089 $\pm$ 0.099 | 0.984 $\pm$ 0.0           | 5.556 $\pm$ 0.014  | 14.06 $\pm$ 0.046  | 0.987 $\pm$ 0   | 6.462 $\pm$ 0      | 12.983 $\pm$ 0     |
| 19  | 0.984 $\pm$ 0.0      | 7.384 $\pm$ 0.144  | 14.203 $\pm$ 0.091 | 0.983 $\pm$ 0.0           | 5.844 $\pm$ 0.018  | 14.885 $\pm$ 0.058 | 0.985 $\pm$ 0   | 6.89 $\pm$ 0       | 13.869 $\pm$ 0     |
| 20  | 0.982 $\pm$ 0.0      | 7.324 $\pm$ 0.104  | 14.966 $\pm$ 0.098 | 0.98 $\pm$ 0.0            | 6.244 $\pm$ 0.018  | 15.972 $\pm$ 0.072 | 0.983 $\pm$ 0   | 7.306 $\pm$ 0      | 14.667 $\pm$ 0     |
| 21  | 0.98 $\pm$ 0.0       | 7.86 $\pm$ 0.102   | 15.765 $\pm$ 0.082 | 0.978 $\pm$ 0.0           | 6.56 $\pm$ 0.017   | 16.775 $\pm$ 0.057 | 0.981 $\pm$ 0   | 7.746 $\pm$ 0      | 15.514 $\pm$ 0     |
| 22  | 0.978 $\pm$ 0.0      | 8.43 $\pm$ 0.133   | 16.675 $\pm$ 0.105 | 0.975 $\pm$ 0.0           | 6.934 $\pm$ 0.018  | 17.742 $\pm$ 0.054 | 0.979 $\pm$ 0   | 8.151 $\pm$ 0      | 16.216 $\pm$ 0     |
| 23  | 0.976 $\pm$ 0.001    | 8.785 $\pm$ 0.304  | 17.398 $\pm$ 0.229 | 0.973 $\pm$ 0.0           | 7.293 $\pm$ 0.02   | 18.63 $\pm$ 0.06   | 0.977 $\pm$ 0   | 8.622 $\pm$ 0      | 17.104 $\pm$ 0     |
| 24  | 0.974 $\pm$ 0.0      | 9.313 $\pm$ 0.123  | 18.275 $\pm$ 0.113 | 0.97 $\pm$ 0.0            | 7.727 $\pm$ 0.027  | 19.469 $\pm$ 0.066 | 0.975 $\pm$ 0   | 9.093 $\pm$ 0      | 17.812 $\pm$ 0     |
| 25  | 0.971 $\pm$ 0.0      | 9.802 $\pm$ 0.173  | 19.238 $\pm$ 0.102 | 0.967 $\pm$ 0.0           | 8.144 $\pm$ 0.031  | 20.334 $\pm$ 0.082 | 0.973 $\pm$ 0   | 9.49 $\pm$ 0       | 18.595 $\pm$ 0     |
| 26  | 0.969 $\pm$ 0.0      | 9.925 $\pm$ 0.118  | 19.948 $\pm$ 0.125 | 0.966 $\pm$ 0.0           | 8.417 $\pm$ 0.036  | 20.876 $\pm$ 0.088 | 0.971 $\pm$ 0   | 9.88 $\pm$ 0       | 19.32 $\pm$ 0      |
| 27  | 0.965 $\pm$ 0.0      | 10.521 $\pm$ 0.127 | 20.971 $\pm$ 0.1   | 0.964 $\pm$ 0.001         | 8.73 $\pm$ 0.059   | 21.531 $\pm$ 0.147 | 0.969 $\pm$ 0   | 10.31 $\pm$ 0      | 20.1 $\pm$ 0       |
| 28  | 0.962 $\pm$ 0.0      | 11.004 $\pm$ 0.115 | 21.866 $\pm$ 0.084 | 0.961 $\pm$ 0.0           | 9.09 $\pm$ 0.052   | 22.308 $\pm$ 0.136 | 0.966 $\pm$ 0   | 10.719 $\pm$ 0     | 20.914 $\pm$ 0     |
| 29  | 0.96 $\pm$ 0.0       | 11.405 $\pm$ 0.106 | 22.633 $\pm$ 0.131 | 0.96 $\pm$                |                    |                    |                 |                    |                    |

|     | Linear Interpolation |                    |                    | Hist Based Gradient Boost |                    |                    | Random Forest   |                    |                    |
|-----|----------------------|--------------------|--------------------|---------------------------|--------------------|--------------------|-----------------|--------------------|--------------------|
| $d$ | $R^2$                | MAE                | RMSE               | $R^2$                     | MAE                | RMSE               | $R^2$           | MAE                | RMSE               |
| 1   | 0.998 $\pm$ 0        | 1.817 $\pm$ 0      | 3.246 $\pm$ 0      | 0.999 $\pm$ 0.0           | 1.785 $\pm$ 0.011  | 2.969 $\pm$ 0.012  | 0.999 $\pm$ 0.0 | 1.727 $\pm$ 0.015  | 3.127 $\pm$ 0.041  |
| 2   | 0.996 $\pm$ 0        | 2.401 $\pm$ 0      | 4.129 $\pm$ 0      | 0.999 $\pm$ 0.0           | 2.066 $\pm$ 0.006  | 3.413 $\pm$ 0.007  | 0.999 $\pm$ 0.0 | 2.067 $\pm$ 0.017  | 3.612 $\pm$ 0.044  |
| 3   | 0.994 $\pm$ 0        | 3.149 $\pm$ 0      | 5.305 $\pm$ 0      | 0.998 $\pm$ 0.0           | 2.411 $\pm$ 0.005  | 3.979 $\pm$ 0.009  | 0.998 $\pm$ 0.0 | 2.439 $\pm$ 0.019  | 4.12 $\pm$ 0.035   |
| 4   | 0.991 $\pm$ 0        | 4.054 $\pm$ 0      | 6.707 $\pm$ 0      | 0.998 $\pm$ 0.0           | 2.795 $\pm$ 0.009  | 4.63 $\pm$ 0.017   | 0.998 $\pm$ 0.0 | 2.863 $\pm$ 0.017  | 4.782 $\pm$ 0.042  |
| 5   | 0.987 $\pm$ 0        | 5.088 $\pm$ 0      | 8.269 $\pm$ 0      | 0.997 $\pm$ 0.0           | 3.232 $\pm$ 0.007  | 5.379 $\pm$ 0.013  | 0.997 $\pm$ 0.0 | 3.262 $\pm$ 0.019  | 5.453 $\pm$ 0.03   |
| 6   | 0.982 $\pm$ 0        | 6.232 $\pm$ 0      | 9.943 $\pm$ 0      | 0.996 $\pm$ 0.0           | 3.721 $\pm$ 0.01   | 6.218 $\pm$ 0.018  | 0.996 $\pm$ 0.0 | 3.726 $\pm$ 0.019  | 6.215 $\pm$ 0.023  |
| 7   | 0.977 $\pm$ 0        | 7.469 $\pm$ 0      | 11.7 $\pm$ 0       | 0.995 $\pm$ 0.0           | 4.246 $\pm$ 0.012  | 7.141 $\pm$ 0.02   | 0.995 $\pm$ 0.0 | 4.15 $\pm$ 0.017   | 7.023 $\pm$ 0.019  |
| 8   | 0.971 $\pm$ 0        | 8.792 $\pm$ 0      | 13.523 $\pm$ 0     | 0.994 $\pm$ 0.0           | 4.796 $\pm$ 0.015  | 8.08 $\pm$ 0.024   | 0.994 $\pm$ 0.0 | 4.621 $\pm$ 0.019  | 7.869 $\pm$ 0.018  |
| 9   | 0.964 $\pm$ 0        | 10.185 $\pm$ 0     | 15.399 $\pm$ 0     | 0.992 $\pm$ 0.0           | 5.419 $\pm$ 0.017  | 9.156 $\pm$ 0.034  | 0.993 $\pm$ 0.0 | 5.121 $\pm$ 0.015  | 8.803 $\pm$ 0.017  |
| 10  | 0.956 $\pm$ 0        | 11.617 $\pm$ 0     | 17.311 $\pm$ 0     | 0.99 $\pm$ 0.0            | 6.056 $\pm$ 0.02   | 10.243 $\pm$ 0.038 | 0.991 $\pm$ 0.0 | 5.659 $\pm$ 0.015  | 9.759 $\pm$ 0.014  |
| 11  | 0.948 $\pm$ 0        | 13.107 $\pm$ 0     | 19.264 $\pm$ 0     | 0.988 $\pm$ 0.0           | 6.709 $\pm$ 0.018  | 11.333 $\pm$ 0.032 | 0.989 $\pm$ 0.0 | 6.201 $\pm$ 0.021  | 10.75 $\pm$ 0.017  |
| 12  | 0.939 $\pm$ 0        | 14.639 $\pm$ 0     | 21.247 $\pm$ 0     | 0.985 $\pm$ 0.0           | 7.42 $\pm$ 0.026   | 12.536 $\pm$ 0.043 | 0.987 $\pm$ 0.0 | 6.807 $\pm$ 0.022  | 11.834 $\pm$ 0.021 |
| 13  | 0.93 $\pm$ 0         | 16.205 $\pm$ 0     | 23.253 $\pm$ 0     | 0.982 $\pm$ 0.0           | 8.156 $\pm$ 0.027  | 13.73 $\pm$ 0.041  | 0.984 $\pm$ 0.0 | 7.451 $\pm$ 0.014  | 12.971 $\pm$ 0.016 |
| 14  | 0.92 $\pm$ 0         | 17.798 $\pm$ 0     | 25.277 $\pm$ 0     | 0.978 $\pm$ 0.0           | 8.946 $\pm$ 0.039  | 14.991 $\pm$ 0.054 | 0.981 $\pm$ 0.0 | 8.132 $\pm$ 0.018  | 14.111 $\pm$ 0.015 |
| 15  | 0.909 $\pm$ 0        | 19.416 $\pm$ 0     | 27.316 $\pm$ 0     | 0.974 $\pm$ 0.0           | 9.802 $\pm$ 0.033  | 16.312 $\pm$ 0.055 | 0.978 $\pm$ 0.0 | 8.854 $\pm$ 0.015  | 15.311 $\pm$ 0.016 |
| 16  | 0.898 $\pm$ 0        | 21.056 $\pm$ 0     | 29.365 $\pm$ 0     | 0.97 $\pm$ 0.0            | 10.745 $\pm$ 0.028 | 17.813 $\pm$ 0.044 | 0.974 $\pm$ 0.0 | 9.655 $\pm$ 0.013  | 16.618 $\pm$ 0.011 |
| 17  | 0.886 $\pm$ 0        | 22.712 $\pm$ 0     | 31.423 $\pm$ 0     | 0.965 $\pm$ 0.0           | 11.729 $\pm$ 0.035 | 19.249 $\pm$ 0.041 | 0.97 $\pm$ 0.0  | 10.49 $\pm$ 0.02   | 17.953 $\pm$ 0.02  |
| 18  | 0.873 $\pm$ 0        | 24.378 $\pm$ 0     | 33.485 $\pm$ 0     | 0.959 $\pm$ 0.0           | 12.771 $\pm$ 0.042 | 20.745 $\pm$ 0.059 | 0.965 $\pm$ 0.0 | 11.396 $\pm$ 0.02  | 19.359 $\pm$ 0.02  |
| 19  | 0.859 $\pm$ 0        | 26.049 $\pm$ 0     | 35.544 $\pm$ 0     | 0.953 $\pm$ 0.0           | 13.79 $\pm$ 0.041  | 22.255 $\pm$ 0.061 | 0.96 $\pm$ 0.0  | 12.332 $\pm$ 0.016 | 20.807 $\pm$ 0.02  |
| 20  | 0.845 $\pm$ 0        | 27.715 $\pm$ 0     | 37.603 $\pm$ 0     | 0.946 $\pm$ 0.0           | 14.843 $\pm$ 0.055 | 23.827 $\pm$ 0.066 | 0.953 $\pm$ 0.0 | 13.337 $\pm$ 0.018 | 22.331 $\pm$ 0.019 |
| 21  | 0.83 $\pm$ 0         | 29.375 $\pm$ 0     | 39.651 $\pm$ 0     | 0.939 $\pm$ 0.0           | 15.993 $\pm$ 0.045 | 25.499 $\pm$ 0.07  | 0.947 $\pm$ 0.0 | 14.32 $\pm$ 0.021  | 23.814 $\pm$ 0.014 |
| 22  | 0.815 $\pm$ 0        | 31.022 $\pm$ 0     | 41.682 $\pm$ 0     | 0.931 $\pm$ 0.0           | 17.182 $\pm$ 0.031 | 27.119 $\pm$ 0.045 | 0.94 $\pm$ 0.0  | 15.397 $\pm$ 0.019 | 25.38 $\pm$ 0.025  |
| 23  | 0.799 $\pm$ 0        | 32.651 $\pm$ 0     | 43.692 $\pm$ 0     | 0.922 $\pm$ 0.0           | 18.423 $\pm$ 0.06  | 28.877 $\pm$ 0.074 | 0.933 $\pm$ 0.0 | 16.539 $\pm$ 0.026 | 27.036 $\pm$ 0.027 |
| 24  | 0.783 $\pm$ 0        | 34.256 $\pm$ 0     | 45.676 $\pm$ 0     | 0.913 $\pm$ 0.001         | 19.708 $\pm$ 0.052 | 30.518 $\pm$ 0.08  | 0.924 $\pm$ 0.0 | 17.705 $\pm$ 0.025 | 28.702 $\pm$ 0.021 |
| 25  | 0.766 $\pm$ 0        | 35.834 $\pm$ 0     | 47.63 $\pm$ 0      | 0.903 $\pm$ 0.001         | 21.049 $\pm$ 0.072 | 32.422 $\pm$ 0.089 | 0.915 $\pm$ 0.0 | 18.907 $\pm$ 0.028 | 30.406 $\pm$ 0.022 |
| 26  | 0.749 $\pm$ 0        | 37.379 $\pm$ 0     | 49.551 $\pm$ 0     | 0.891 $\pm$ 0.001         | 22.341 $\pm$ 0.063 | 34.197 $\pm$ 0.087 | 0.905 $\pm$ 0.0 | 20.136 $\pm$ 0.027 | 32.078 $\pm$ 0.024 |
| 27  | 0.731 $\pm$ 0        | 38.89 $\pm$ 0      | 51.434 $\pm$ 0     | 0.881 $\pm$ 0.001         | 23.621 $\pm$ 0.05  | 35.824 $\pm$ 0.068 | 0.896 $\pm$ 0.0 | 21.289 $\pm$ 0.029 | 33.636 $\pm$ 0.02  |
| 28  | 0.714 $\pm$ 0        | 40.365 $\pm$ 0     | 53.278 $\pm$ 0     | 0.872 $\pm$ 0.001         | 24.788 $\pm$ 0.056 | 37.311 $\pm$ 0.089 | 0.887 $\pm$ 0.0 | 22.376 $\pm$ 0.019 | 35.029 $\pm$ 0.02  |
| 29  | 0.696 $\pm$ 0        | 41.801 $\pm$ 0     | 55.079 $\pm$ 0     | 0.86 $\pm$ 0.001          | 26.058 $\pm$ 0.064 | 38.91 $\pm$ 0.082  | 0.878 $\pm$ 0.0 | 23.579 $\pm$ 0.02  | 36.516 $\pm$ 0.017 |
| 30  | 0.679 $\pm$ 0        | 43.199 $\pm$ 0     | 56.838 $\pm$ 0     | 0.849 $\pm$ 0.001         | 27.39 $\pm$ 0.055  | 40.514 $\pm$ 0.085 | 0.867 $\pm$ 0.0 | 24.73 $\pm$ 0.031  | 38.011 $\pm$ 0.03  |
|     | Neural Network (MLP) |                    |                    | Ada Boost                 |                    |                    | XGBoost         |                    |                    |
| $d$ | $R^2$                | MAE                | RMSE               | $R^2$                     | MAE                | RMSE               | $R^2$           | MAE                | RMSE               |
| 1   | 0.998 $\pm$ 0.0      | 2.659 $\pm$ 0.273  | 4.129 $\pm$ 0.404  | 0.999 $\pm$ 0.0           | 1.601 $\pm$ 0.002  | 2.915 $\pm$ 0.003  | 0.999 $\pm$ 0   | 1.766 $\pm$ 0      | 2.986 $\pm$ 0      |
| 2   | 0.998 $\pm$ 0.0      | 2.709 $\pm$ 0.185  | 4.158 $\pm$ 0.219  | 0.999 $\pm$ 0.0           | 1.906 $\pm$ 0.001  | 3.419 $\pm$ 0.003  | 0.999 $\pm$ 0   | 2.095 $\pm$ 0      | 3.472 $\pm$ 0      |
| 3   | 0.997 $\pm$ 0.0      | 2.907 $\pm$ 0.164  | 4.51 $\pm$ 0.183   | 0.998 $\pm$ 0.0           | 2.266 $\pm$ 0.002  | 4.075 $\pm$ 0.004  | 0.998 $\pm$ 0   | 2.459 $\pm$ 0      | 4.031 $\pm$ 0      |
| 4   | 0.996 $\pm$ 0.0      | 3.687 $\pm$ 0.08   | 5.57 $\pm$ 0.088   | 0.998 $\pm$ 0.0           | 2.646 $\pm$ 0.003  | 4.803 $\pm$ 0.006  | 0.998 $\pm$ 0   | 2.845 $\pm$ 0      | 4.675 $\pm$ 0      |
| 5   | 0.996 $\pm$ 0.0      | 4.159 $\pm$ 0.077  | 6.346 $\pm$ 0.081  | 0.997 $\pm$ 0.0           | 3.057 $\pm$ 0.003  | 5.611 $\pm$ 0.008  | 0.997 $\pm$ 0   | 3.291 $\pm$ 0      | 5.428 $\pm$ 0      |
| 6   | 0.995 $\pm$ 0.0      | 4.709 $\pm$ 0.1    | 7.244 $\pm$ 0.11   | 0.996 $\pm$ 0.0           | 3.5 $\pm$ 0.005    | 6.502 $\pm$ 0.011  | 0.996 $\pm$ 0   | 3.744 $\pm$ 0      | 6.218 $\pm$ 0      |
| 7   | 0.994 $\pm$ 0.0      | 5.323 $\pm$ 0.16   | 8.19 $\pm$ 0.178   | 0.994 $\pm$ 0.0           | 3.99 $\pm$ 0.008   | 7.572 $\pm$ 0.018  | 0.995 $\pm$ 0   | 4.26 $\pm$ 0       | 7.14 $\pm$ 0       |
| 8   | 0.993 $\pm$ 0.0      | 5.647 $\pm$ 0.163  | 8.914 $\pm$ 0.163  | 0.993 $\pm$ 0.0           | 4.501 $\pm$ 0.005  | 8.668 $\pm$ 0.014  | 0.994 $\pm$ 0   | 4.802 $\pm$ 0      | 8.111 $\pm$ 0      |
| 9   | 0.991 $\pm$ 0.0      | 6.337 $\pm$ 0.136  | 9.961 $\pm$ 0.135  | 0.991 $\pm$ 0.0           | 5.046 $\pm$ 0.008  | 9.789 $\pm$ 0.019  | 0.992 $\pm$ 0   | 5.367 $\pm$ 0      | 9.098 $\pm$ 0      |
| 10  | 0.989 $\pm$ 0.0      | 6.927 $\pm$ 0.144  | 10.978 $\pm$ 0.139 | 0.989 $\pm$ 0.0           | 5.567 $\pm$ 0.007  | 10.885 $\pm$ 0.017 | 0.99 $\pm$ 0    | 5.934 $\pm$ 0      | 10.111 $\pm$ 0     |
| 11  | 0.987 $\pm$ 0.0      | 7.679 $\pm$ 0.114  | 12.085 $\pm$ 0.103 | 0.986 $\pm$ 0.0           | 6.175 $\pm$ 0.008  | 12.123 $\pm$ 0.021 | 0.988 $\pm$ 0   | 6.58 $\pm$ 0       | 11.214 $\pm$ 0     |
| 12  | 0.985 $\pm$ 0.0      | 7.927 $\pm$ 0.129  | 12.866 $\pm$ 0.112 | 0.983 $\pm$ 0.0           | 6.763 $\pm$ 0.011  | 13.352 $\pm$ 0.024 | 0.985 $\pm$ 0   | 7.239 $\pm$ 0      | 12.346 $\pm$ 0     |
| 13  | 0.982 $\pm$ 0.0      | 8.913 $\pm$ 0.107  | 14.293 $\pm$ 0.093 | 0.979 $\pm$ 0.0           | 7.413 $\pm$ 0.01   | 14.636 $\pm$ 0.025 | 0.982 $\pm$ 0   | 7.961 $\pm$ 0      | 13.573 $\pm$ 0     |
| 14  | 0.978 $\pm$ 0.0      | 9.688 $\pm$ 0.177  | 15.562 $\pm$ 0.145 | 0.975 $\pm$ 0.0           | 8.195 $\pm$ 0.012  | 16.115 $\pm$ 0.031 | 0.979 $\pm$ 0   | 8.722 $\pm$ 0      | 14.806 $\pm$ 0     |
| 15  | 0.974 $\pm$ 0.0      | 10.378 $\pm$ 0.194 | 16.735 $\pm$ 0.173 | 0.97 $\pm$ 0.0            | 8.971 $\pm$ 0.021  | 17.512 $\pm$ 0.042 | 0.975 $\pm$ 0   | 9.561 $\pm$ 0      | 16.152 $\pm$ 0     |
| 16  | 0.97 $\pm$ 0.001     | 11.117 $\pm$ 0.274 | 18.015 $\pm$ 0.225 | 0.966 $\pm$ 0.0           | 9.73 $\pm$ 0.02    | 18.839 $\pm$ 0.054 | 0.971 $\pm$ 0   | 10.426 $\pm$ 0     | 17.53 $\pm$ 0      |
| 17  | 0.965 $\pm$ 0.0      | 12.221 $\pm$ 0.17  | 19.612 $\pm$ 0.133 | 0.96 $\pm$ 0.0            | 10.621 $\pm$ 0.015 | 20.462 $\pm$ 0.044 | 0.966 $\pm$ 0   | 11.352 $\pm$ 0     | 18.946 $\pm$ 0     |
| 18  | 0.959 $\pm$ 0.001    | 13.057 $\pm$ 0.189 | 20.951 $\pm$ 0.157 | 0.955 $\pm$ 0.0           | 11.581 $\pm$ 0.023 | 22.064 $\pm$ 0.061 | 0.96 $\pm$ 0    | 12.401 $\pm$ 0     | 20.516 $\pm$ 0     |
| 19  | 0.953 $\pm$ 0.001    | 14.176 $\pm$ 0.332 | 22.551 $\pm$ 0.251 | 0.947 $\pm$ 0.0           | 12.602 $\pm$ 0.032 | 23.738 $\pm$ 0.069 | 0.955 $\pm$ 0   | 13.38 $\pm$ 0      | 21.977 $\pm$ 0     |
| 20  | 0.945 $\pm$ 0.0      | 15.431 $\pm$ 0.159 | 24.256 $\pm$ 0.129 | 0.939 $\pm$ 0.0           | 13.664 $\pm$ 0.042 | 25.495 $\pm$ 0.085 | 0.948 $\pm$ 0   | 14.475 $\pm$ 0     | 23.577 $\pm$ 0     |
| 21  | 0.939 $\pm$ 0.001    | 16.18 $\pm$ 0.252  | 25.62 $\pm$ 0.184  | 0.933 $\pm$ 0.0           | 14.505 $\pm$ 0.049 | 26.833 $\pm$ 0.08  | 0.941 $\pm$ 0   | 15.491 $\pm$ 0     | 25.061 $\pm$ 0     |
| 22  | 0.931 $\pm$ 0.001    | 17.389 $\pm$ 0.184 | 27.292 $\pm$ 0.128 | 0.924 $\pm$ 0.0           | 15.627 $\pm$ 0.038 | 28.698 $\pm$ 0.069 | 0.934 $\pm$ 0   | 16.565 $\pm$ 0     | 26.576 $\pm$ 0     |
| 23  | 0.922 $\pm$ 0.001    | 18.268 $\pm$ 0.381 | 28.845 $\pm$ 0.293 | 0.915 $\pm$ 0.001         | 16.743 $\pm$ 0.051 | 30.442 $\pm$ 0.111 | 0.926 $\pm$ 0   | 17.745 $\pm$ 0     | 28.297 $\pm$ 0     |
| 24  | 0.912 $\pm$ 0.001    | 19.886 $\pm$ 0.134 | 30.766 $\pm$ 0.107 | 0.906 $\pm$ 0.0           | 17.895 $\pm$ 0.036 | 32.131 $\pm$ 0.078 | 0.917 $\pm$ 0   | 18.97 $\pm$ 0      | 29.999 $\pm$ 0     |
| 25  | 0.902 $\pm$ 0.001    | 20.844 $\pm$ 0.146 | 32.474 $\pm$ 0.125 | 0.895 $\pm$ 0.0           | 19.2 $\pm$ 0.032   | 34.087 $\pm$ 0.058 | 0.908 $\pm$ 0   | 20.201 $\pm$ 0     | 31.678 $\pm$ 0     |
| 26  | 0.892 $\pm$ 0.001    | 22.293 $\pm$ 0.144 | 34.014 $\pm$ 0.141 | 0.882 $\pm$ 0.0           | 20.571 $\pm$ 0.021 | 36.202 $\pm$ 0.047 | 0.898 $\pm$ 0   | 21.442 $\pm$ 0     | 33.386 $\pm$ 0     |
| 27  | 0.882 $\pm$ 0.001    | 23.592 $\pm$ 0.112 | 35.73 $\pm$ 0.095  | 0.872 $\pm$ 0.0           | 21.7 $\pm$ 0.028   | 37.685 $\pm$ 0.049 | 0.888 $\pm$ 0   | 22.654 $\pm$ 0     | 34.953 $\pm$ 0     |
| 28  | 0.872 $\pm$ 0.001    | 24.374 $\pm$ 0.383 | 37.136 $\pm$ 0.165 | 0.862 $\pm$ 0.0           | 22.801 $\pm$ 0.035 | 39.094 $\pm$ 0.064 | 0.878 $\pm$ 0   | 23.845 $\pm$ 0     | 36.487 $\pm$ 0     |
| 29  | 0.862 $\pm$          |                    |                    |                           |                    |                    |                 |                    |                    |

|     | Linear Interpolation |                    |                    | Hist Based Gradient Boost |                    |                    | Random Forest   |                    |                    |
|-----|----------------------|--------------------|--------------------|---------------------------|--------------------|--------------------|-----------------|--------------------|--------------------|
| $d$ | $R^2$                | $MAE$              | $RMSE$             | $R^2$                     | $MAE$              | $RMSE$             | $R^2$           | $MAE$              | $RMSE$             |
| 1   | 0.998 $\pm$ 0        | 1.063 $\pm$ 0      | 2.072 $\pm$ 0      | 1.0 $\pm$ 0.0             | 1.024 $\pm$ 0.007  | 1.638 $\pm$ 0.009  | 1.0 $\pm$ 0.0   | 0.901 $\pm$ 0.009  | 1.651 $\pm$ 0.033  |
| 2   | 0.997 $\pm$ 0        | 1.608 $\pm$ 0      | 3.125 $\pm$ 0      | 1.0 $\pm$ 0.0             | 1.223 $\pm$ 0.009  | 2.083 $\pm$ 0.007  | 1.0 $\pm$ 0.0   | 1.173 $\pm$ 0.007  | 2.19 $\pm$ 0.019   |
| 3   | 0.995 $\pm$ 0        | 2.33 $\pm$ 0       | 4.431 $\pm$ 0      | 0.999 $\pm$ 0.0           | 1.451 $\pm$ 0.005  | 2.612 $\pm$ 0.009  | 0.999 $\pm$ 0.0 | 1.547 $\pm$ 0.018  | 2.836 $\pm$ 0.027  |
| 4   | 0.992 $\pm$ 0        | 3.211 $\pm$ 0      | 5.914 $\pm$ 0      | 0.999 $\pm$ 0.0           | 1.731 $\pm$ 0.007  | 3.243 $\pm$ 0.016  | 0.999 $\pm$ 0.0 | 1.879 $\pm$ 0.014  | 3.459 $\pm$ 0.021  |
| 5   | 0.988 $\pm$ 0        | 4.226 $\pm$ 0      | 7.521 $\pm$ 0      | 0.999 $\pm$ 0.0           | 2.041 $\pm$ 0.006  | 3.893 $\pm$ 0.015  | 0.998 $\pm$ 0.0 | 2.226 $\pm$ 0.017  | 4.141 $\pm$ 0.021  |
| 6   | 0.983 $\pm$ 0        | 5.364 $\pm$ 0      | 9.227 $\pm$ 0      | 0.998 $\pm$ 0.0           | 2.398 $\pm$ 0.009  | 4.644 $\pm$ 0.017  | 0.998 $\pm$ 0.0 | 2.603 $\pm$ 0.02   | 4.852 $\pm$ 0.022  |
| 7   | 0.978 $\pm$ 0        | 6.61 $\pm$ 0       | 11.015 $\pm$ 0     | 0.997 $\pm$ 0.0           | 2.786 $\pm$ 0.011  | 5.434 $\pm$ 0.023  | 0.997 $\pm$ 0.0 | 2.911 $\pm$ 0.023  | 5.552 $\pm$ 0.025  |
| 8   | 0.972 $\pm$ 0        | 7.954 $\pm$ 0      | 12.873 $\pm$ 0     | 0.996 $\pm$ 0.0           | 3.199 $\pm$ 0.009  | 6.271 $\pm$ 0.02   | 0.996 $\pm$ 0.0 | 3.312 $\pm$ 0.018  | 6.314 $\pm$ 0.016  |
| 9   | 0.965 $\pm$ 0        | 9.386 $\pm$ 0      | 14.793 $\pm$ 0     | 0.995 $\pm$ 0.0           | 3.67 $\pm$ 0.017   | 7.176 $\pm$ 0.033  | 0.995 $\pm$ 0.0 | 3.655 $\pm$ 0.016  | 7.11 $\pm$ 0.017   |
| 10  | 0.957 $\pm$ 0        | 10.894 $\pm$ 0     | 16.767 $\pm$ 0     | 0.994 $\pm$ 0.0           | 4.161 $\pm$ 0.016  | 8.084 $\pm$ 0.035  | 0.994 $\pm$ 0.0 | 4.106 $\pm$ 0.022  | 7.978 $\pm$ 0.018  |
| 11  | 0.949 $\pm$ 0        | 12.467 $\pm$ 0     | 18.786 $\pm$ 0     | 0.992 $\pm$ 0.0           | 4.631 $\pm$ 0.017  | 8.999 $\pm$ 0.031  | 0.993 $\pm$ 0.0 | 4.519 $\pm$ 0.024  | 8.86 $\pm$ 0.02    |
| 12  | 0.94 $\pm$ 0         | 14.086 $\pm$ 0     | 20.843 $\pm$ 0     | 0.99 $\pm$ 0.0            | 5.184 $\pm$ 0.025  | 9.979 $\pm$ 0.043  | 0.991 $\pm$ 0.0 | 5.021 $\pm$ 0.02   | 9.798 $\pm$ 0.019  |
| 13  | 0.93 $\pm$ 0         | 15.734 $\pm$ 0     | 22.929 $\pm$ 0     | 0.988 $\pm$ 0.0           | 5.789 $\pm$ 0.02   | 11.095 $\pm$ 0.035 | 0.989 $\pm$ 0.0 | 5.477 $\pm$ 0.022  | 10.76 $\pm$ 0.016  |
| 14  | 0.92 $\pm$ 0         | 17.404 $\pm$ 0     | 25.038 $\pm$ 0     | 0.985 $\pm$ 0.0           | 6.406 $\pm$ 0.031  | 12.151 $\pm$ 0.052 | 0.987 $\pm$ 0.0 | 5.977 $\pm$ 0.015  | 11.755 $\pm$ 0.014 |
| 15  | 0.908 $\pm$ 0        | 19.088 $\pm$ 0     | 27.163 $\pm$ 0     | 0.982 $\pm$ 0.0           | 7.077 $\pm$ 0.024  | 13.372 $\pm$ 0.044 | 0.984 $\pm$ 0.0 | 6.542 $\pm$ 0.015  | 12.838 $\pm$ 0.018 |
| 16  | 0.896 $\pm$ 0        | 20.785 $\pm$ 0     | 29.303 $\pm$ 0     | 0.979 $\pm$ 0.0           | 7.781 $\pm$ 0.033  | 14.612 $\pm$ 0.055 | 0.981 $\pm$ 0.0 | 7.136 $\pm$ 0.023  | 13.921 $\pm$ 0.018 |
| 17  | 0.883 $\pm$ 0        | 22.493 $\pm$ 0     | 31.455 $\pm$ 0     | 0.975 $\pm$ 0.0           | 8.59 $\pm$ 0.052   | 15.951 $\pm$ 0.061 | 0.978 $\pm$ 0.0 | 7.799 $\pm$ 0.016  | 15.114 $\pm$ 0.016 |
| 18  | 0.869 $\pm$ 0        | 24.212 $\pm$ 0     | 33.616 $\pm$ 0     | 0.97 $\pm$ 0.0            | 9.437 $\pm$ 0.044  | 17.297 $\pm$ 0.065 | 0.974 $\pm$ 0.0 | 8.509 $\pm$ 0.019  | 16.403 $\pm$ 0.018 |
| 19  | 0.853 $\pm$ 0        | 25.94 $\pm$ 0      | 35.784 $\pm$ 0     | 0.965 $\pm$ 0.0           | 10.308 $\pm$ 0.045 | 18.772 $\pm$ 0.055 | 0.969 $\pm$ 0.0 | 9.279 $\pm$ 0.021  | 17.744 $\pm$ 0.021 |
| 20  | 0.837 $\pm$ 0        | 27.678 $\pm$ 0     | 37.957 $\pm$ 0     | 0.959 $\pm$ 0.0           | 11.248 $\pm$ 0.05  | 20.269 $\pm$ 0.064 | 0.964 $\pm$ 0.0 | 10.003 $\pm$ 0.023 | 19.075 $\pm$ 0.017 |
| 21  | 0.82 $\pm$ 0         | 29.427 $\pm$ 0     | 40.133 $\pm$ 0     | 0.953 $\pm$ 0.0           | 12.185 $\pm$ 0.06  | 21.759 $\pm$ 0.066 | 0.959 $\pm$ 0.0 | 10.904 $\pm$ 0.022 | 20.5 $\pm$ 0.022   |
| 22  | 0.802 $\pm$ 0        | 31.186 $\pm$ 0     | 42.31 $\pm$ 0      | 0.946 $\pm$ 0.0           | 13.259 $\pm$ 0.056 | 23.391 $\pm$ 0.077 | 0.952 $\pm$ 0.0 | 11.817 $\pm$ 0.028 | 21.956 $\pm$ 0.022 |
| 23  | 0.783 $\pm$ 0        | 32.951 $\pm$ 0     | 44.484 $\pm$ 0     | 0.938 $\pm$ 0.0           | 14.376 $\pm$ 0.054 | 25.0 $\pm$ 0.069   | 0.947 $\pm$ 0.0 | 12.688 $\pm$ 0.03  | 23.317 $\pm$ 0.025 |
| 24  | 0.763 $\pm$ 0        | 34.716 $\pm$ 0     | 46.654 $\pm$ 0     | 0.931 $\pm$ 0.001         | 15.484 $\pm$ 0.083 | 26.559 $\pm$ 0.103 | 0.939 $\pm$ 0.0 | 13.713 $\pm$ 0.029 | 24.812 $\pm$ 0.02  |
| 25  | 0.742 $\pm$ 0        | 36.478 $\pm$ 0     | 48.816 $\pm$ 0     | 0.922 $\pm$ 0.001         | 16.534 $\pm$ 0.076 | 28.037 $\pm$ 0.094 | 0.931 $\pm$ 0.0 | 14.689 $\pm$ 0.038 | 26.345 $\pm$ 0.027 |
| 26  | 0.72 $\pm$ 0         | 38.235 $\pm$ 0     | 50.967 $\pm$ 0     | 0.913 $\pm$ 0.001         | 17.713 $\pm$ 0.081 | 29.697 $\pm$ 0.1   | 0.923 $\pm$ 0.0 | 15.747 $\pm$ 0.04  | 27.9 $\pm$ 0.026   |
| 27  | 0.698 $\pm$ 0        | 39.983 $\pm$ 0     | 53.103 $\pm$ 0     | 0.903 $\pm$ 0.0           | 18.826 $\pm$ 0.059 | 31.233 $\pm$ 0.069 | 0.915 $\pm$ 0.0 | 16.825 $\pm$ 0.059 | 29.437 $\pm$ 0.037 |
| 28  | 0.675 $\pm$ 0        | 41.719 $\pm$ 0     | 55.22 $\pm$ 0      | 0.893 $\pm$ 0.001         | 20.07 $\pm$ 0.065  | 32.883 $\pm$ 0.082 | 0.906 $\pm$ 0.0 | 17.811 $\pm$ 0.034 | 30.853 $\pm$ 0.027 |
| 29  | 0.652 $\pm$ 0        | 43.436 $\pm$ 0     | 57.315 $\pm$ 0     | 0.884 $\pm$ 0.001         | 21.2 $\pm$ 0.103   | 34.353 $\pm$ 0.112 | 0.897 $\pm$ 0.0 | 19.002 $\pm$ 0.046 | 32.351 $\pm$ 0.029 |
| 30  | 0.629 $\pm$ 0        | 45.13 $\pm$ 0      | 59.383 $\pm$ 0     | 0.871 $\pm$ 0.001         | 22.606 $\pm$ 0.118 | 36.122 $\pm$ 0.112 | 0.887 $\pm$ 0.0 | 20.074 $\pm$ 0.065 | 33.79 $\pm$ 0.031  |
|     | Neural Network (MLP) |                    |                    | Ada Boost                 |                    |                    | XGBoost         |                    |                    |
| $d$ | $R^2$                | $MAE$              | $RMSE$             | $R^2$                     | $MAE$              | $RMSE$             | $R^2$           | $MAE$              | $RMSE$             |
| 1   | 0.999 $\pm$ 0.0      | 1.181 $\pm$ 0.064  | 1.926 $\pm$ 0.109  | 1.0 $\pm$ 0.0             | 0.771 $\pm$ 0.001  | 1.42 $\pm$ 0.002   | 1.0 $\pm$ 0     | 0.894 $\pm$ 0      | 1.487 $\pm$ 0      |
| 2   | 0.999 $\pm$ 0.0      | 1.379 $\pm$ 0.048  | 2.312 $\pm$ 0.056  | 1.0 $\pm$ 0.0             | 0.964 $\pm$ 0.001  | 1.967 $\pm$ 0.003  | 1.0 $\pm$ 0     | 1.13 $\pm$ 0       | 2.001 $\pm$ 0      |
| 3   | 0.999 $\pm$ 0.0      | 1.629 $\pm$ 0.056  | 2.825 $\pm$ 0.066  | 0.999 $\pm$ 0.0           | 1.215 $\pm$ 0.002  | 2.609 $\pm$ 0.005  | 0.999 $\pm$ 0   | 1.397 $\pm$ 0      | 2.577 $\pm$ 0      |
| 4   | 0.999 $\pm$ 0.0      | 1.989 $\pm$ 0.032  | 3.507 $\pm$ 0.036  | 0.999 $\pm$ 0.0           | 1.485 $\pm$ 0.002  | 3.325 $\pm$ 0.006  | 0.999 $\pm$ 0   | 1.692 $\pm$ 0      | 3.213 $\pm$ 0      |
| 5   | 0.998 $\pm$ 0.0      | 2.354 $\pm$ 0.044  | 4.219 $\pm$ 0.044  | 0.998 $\pm$ 0.0           | 1.771 $\pm$ 0.004  | 4.054 $\pm$ 0.009  | 0.999 $\pm$ 0   | 2.027 $\pm$ 0      | 3.91 $\pm$ 0       |
| 6   | 0.998 $\pm$ 0.0      | 2.579 $\pm$ 0.065  | 4.837 $\pm$ 0.065  | 0.998 $\pm$ 0.0           | 2.1 $\pm$ 0.004    | 4.922 $\pm$ 0.015  | 0.998 $\pm$ 0   | 2.367 $\pm$ 0      | 4.646 $\pm$ 0      |
| 7   | 0.997 $\pm$ 0.0      | 2.9 $\pm$ 0.067    | 5.573 $\pm$ 0.058  | 0.997 $\pm$ 0.0           | 2.426 $\pm$ 0.004  | 5.788 $\pm$ 0.013  | 0.997 $\pm$ 0   | 2.729 $\pm$ 0      | 5.426 $\pm$ 0      |
| 8   | 0.996 $\pm$ 0.0      | 3.358 $\pm$ 0.075  | 6.453 $\pm$ 0.059  | 0.996 $\pm$ 0.0           | 2.764 $\pm$ 0.006  | 6.608 $\pm$ 0.011  | 0.996 $\pm$ 0   | 3.128 $\pm$ 0      | 6.229 $\pm$ 0      |
| 9   | 0.995 $\pm$ 0.0      | 3.756 $\pm$ 0.055  | 7.317 $\pm$ 0.049  | 0.994 $\pm$ 0.0           | 3.173 $\pm$ 0.004  | 7.659 $\pm$ 0.014  | 0.995 $\pm$ 0   | 3.565 $\pm$ 0      | 7.129 $\pm$ 0      |
| 10  | 0.993 $\pm$ 0.0      | 4.309 $\pm$ 0.068  | 8.268 $\pm$ 0.053  | 0.993 $\pm$ 0.0           | 3.611 $\pm$ 0.003  | 8.771 $\pm$ 0.012  | 0.994 $\pm$ 0   | 4.024 $\pm$ 0      | 8.022 $\pm$ 0      |
| 11  | 0.992 $\pm$ 0.0      | 4.655 $\pm$ 0.054  | 9.155 $\pm$ 0.051  | 0.991 $\pm$ 0.0           | 4.008 $\pm$ 0.005  | 9.671 $\pm$ 0.02   | 0.992 $\pm$ 0   | 4.522 $\pm$ 0      | 8.977 $\pm$ 0      |
| 12  | 0.99 $\pm$ 0.0       | 5.246 $\pm$ 0.09   | 10.233 $\pm$ 0.092 | 0.989 $\pm$ 0.0           | 4.504 $\pm$ 0.007  | 10.793 $\pm$ 0.02  | 0.99 $\pm$ 0    | 5.022 $\pm$ 0      | 9.958 $\pm$ 0      |
| 13  | 0.987 $\pm$ 0.0      | 5.733 $\pm$ 0.087  | 11.325 $\pm$ 0.076 | 0.986 $\pm$ 0.0           | 5.041 $\pm$ 0.011  | 12.032 $\pm$ 0.033 | 0.988 $\pm$ 0   | 5.586 $\pm$ 0      | 11.026 $\pm$ 0     |
| 14  | 0.985 $\pm$ 0.0      | 6.501 $\pm$ 0.089  | 12.5 $\pm$ 0.11    | 0.983 $\pm$ 0.0           | 5.636 $\pm$ 0.007  | 13.317 $\pm$ 0.026 | 0.985 $\pm$ 0   | 6.222 $\pm$ 0      | 12.179 $\pm$ 0     |
| 15  | 0.982 $\pm$ 0.0      | 7.04 $\pm$ 0.249   | 13.61 $\pm$ 0.154  | 0.979 $\pm$ 0.0           | 6.24 $\pm$ 0.009   | 14.57 $\pm$ 0.029  | 0.982 $\pm$ 0   | 6.829 $\pm$ 0      | 13.299 $\pm$ 0     |
| 16  | 0.977 $\pm$ 0.001    | 8.054 $\pm$ 0.375  | 15.102 $\pm$ 0.201 | 0.975 $\pm$ 0.0           | 6.916 $\pm$ 0.012  | 16.026 $\pm$ 0.025 | 0.979 $\pm$ 0   | 7.475 $\pm$ 0      | 14.432 $\pm$ 0     |
| 17  | 0.972 $\pm$ 0.001    | 9.44 $\pm$ 0.413   | 16.725 $\pm$ 0.257 | 0.97 $\pm$ 0.0            | 7.694 $\pm$ 0.016  | 17.607 $\pm$ 0.04  | 0.975 $\pm$ 0   | 8.278 $\pm$ 0      | 15.848 $\pm$ 0     |
| 18  | 0.967 $\pm$ 0.001    | 10.263 $\pm$ 0.482 | 18.164 $\pm$ 0.246 | 0.965 $\pm$ 0.0           | 8.513 $\pm$ 0.017  | 19.146 $\pm$ 0.046 | 0.971 $\pm$ 0   | 9.059 $\pm$ 0      | 17.169 $\pm$ 0     |
| 19  | 0.963 $\pm$ 0.001    | 10.186 $\pm$ 0.392 | 19.191 $\pm$ 0.22  | 0.958 $\pm$ 0.0           | 9.335 $\pm$ 0.023  | 20.795 $\pm$ 0.056 | 0.965 $\pm$ 0   | 9.927 $\pm$ 0      | 18.659 $\pm$ 0     |
| 20  | 0.955 $\pm$ 0.001    | 12.254 $\pm$ 0.468 | 21.25 $\pm$ 0.339  | 0.951 $\pm$ 0.0           | 10.416 $\pm$ 0.024 | 22.707 $\pm$ 0.05  | 0.96 $\pm$ 0    | 10.891 $\pm$ 0     | 20.237 $\pm$ 0     |
| 21  | 0.949 $\pm$ 0.001    | 13.351 $\pm$ 0.471 | 22.673 $\pm$ 0.273 | 0.944 $\pm$ 0.0           | 11.421 $\pm$ 0.023 | 24.332 $\pm$ 0.035 | 0.953 $\pm$ 0   | 11.856 $\pm$ 0     | 21.756 $\pm$ 0     |
| 22  | 0.941 $\pm$ 0.001    | 14.281 $\pm$ 0.627 | 24.354 $\pm$ 0.353 | 0.935 $\pm$ 0.0           | 12.467 $\pm$ 0.024 | 26.187 $\pm$ 0.057 | 0.947 $\pm$ 0   | 12.844 $\pm$ 0     | 23.241 $\pm$ 0     |
| 23  | 0.934 $\pm$ 0.002    | 15.205 $\pm$ 0.46  | 25.843 $\pm$ 0.383 | 0.928 $\pm$ 0.0           | 13.338 $\pm$ 0.031 | 27.577 $\pm$ 0.055 | 0.94 $\pm$ 0    | 13.883 $\pm$ 0     | 24.711 $\pm$ 0     |
| 24  | 0.927 $\pm$ 0.001    | 16.075 $\pm$ 0.317 | 27.156 $\pm$ 0.247 | 0.915 $\pm$ 0.0           | 14.744 $\pm$ 0.039 | 29.932 $\pm$ 0.09  | 0.932 $\pm$ 0   | 15.073 $\pm$ 0     | 26.379 $\pm$ 0     |
| 25  | 0.918 $\pm$ 0.001    | 17.646 $\pm$ 0.287 | 28.804 $\pm$ 0.265 | 0.904 $\pm$ 0.0           | 15.948 $\pm$ 0.027 | 31.803 $\pm$ 0.055 | 0.922 $\pm$ 0   | 16.272 $\pm$ 0     | 28.108 $\pm$ 0     |
| 26  | 0.908 $\pm$ 0.002    | 17.553 $\pm$ 0.608 | 30.472 $\pm$ 0.392 | 0.891 $\pm$ 0.001         | 17.344 $\pm$ 0.029 | 34.101 $\pm$ 0.082 | 0.913 $\pm$ 0   | 17.49 $\pm$ 0      | 29.84 $\pm$ 0      |
| 27  | 0.898 $\pm$ 0.002    | 19.865 $\pm$ 0.689 | 32.2 $\pm$ 0.443   | 0.88 $\pm$ 0.001          | 18.656 $\pm$ 0.05  | 35.845 $\pm$ 0.085 | 0.904 $\pm$ 0   | 18.556 $\pm$ 0     | 31.34 $\pm$ 0      |
| 28  | 0.89 $\pm$ 0.002     | 20.908 $\pm$ 0.498 | 33.317 $\pm$ 0.304 | 0.871 $\pm$ 0.0           | 19.665 $\pm$ 0.035 | 36.967 $\pm$ 0.055 | 0.895 $\pm$ 0   | 19.579 $\pm$ 0     | 32.689 $\pm$ 0     |
| 29  | 0.                   |                    |                    |                           |                    |                    |                 |                    |                    |

|     | Linear Interpolation |                   |                   | Hist Based Gradient Boost |                   |                   | Random Forest   |                   |                   |
|-----|----------------------|-------------------|-------------------|---------------------------|-------------------|-------------------|-----------------|-------------------|-------------------|
| $d$ | $R^2$                | $MAE$             | $RMSE$            | $R^2$                     | $MAE$             | $RMSE$            | $R^2$           | $MAE$             | $RMSE$            |
| 1   | 0.999 $\pm$ 0        | 0.028 $\pm$ 0     | 0.123 $\pm$ 0     | 1.0 $\pm$ 0.0             | 0.041 $\pm$ 0.005 | 0.1 $\pm$ 0.012   | 0.999 $\pm$ 0.0 | 0.023 $\pm$ 0.001 | 0.104 $\pm$ 0.003 |
| 2   | 0.998 $\pm$ 0        | 0.052 $\pm$ 0     | 0.156 $\pm$ 0     | 0.999 $\pm$ 0.0           | 0.074 $\pm$ 0.01  | 0.159 $\pm$ 0.01  | 0.999 $\pm$ 0.0 | 0.038 $\pm$ 0.001 | 0.137 $\pm$ 0.002 |
| 3   | 0.997 $\pm$ 0        | 0.084 $\pm$ 0     | 0.192 $\pm$ 0     | 0.998 $\pm$ 0.0           | 0.078 $\pm$ 0.006 | 0.172 $\pm$ 0.005 | 0.998 $\pm$ 0.0 | 0.054 $\pm$ 0.0   | 0.161 $\pm$ 0.001 |
| 4   | 0.996 $\pm$ 0        | 0.12 $\pm$ 0      | 0.232 $\pm$ 0     | 0.998 $\pm$ 0.0           | 0.084 $\pm$ 0.005 | 0.175 $\pm$ 0.008 | 0.998 $\pm$ 0.0 | 0.072 $\pm$ 0.001 | 0.185 $\pm$ 0.002 |
| 5   | 0.994 $\pm$ 0        | 0.156 $\pm$ 0     | 0.274 $\pm$ 0     | 0.997 $\pm$ 0.0           | 0.101 $\pm$ 0.006 | 0.208 $\pm$ 0.007 | 0.997 $\pm$ 0.0 | 0.09 $\pm$ 0.001  | 0.213 $\pm$ 0.002 |
| 6   | 0.992 $\pm$ 0        | 0.193 $\pm$ 0     | 0.318 $\pm$ 0     | 0.996 $\pm$ 0.0           | 0.121 $\pm$ 0.004 | 0.243 $\pm$ 0.008 | 0.996 $\pm$ 0.0 | 0.109 $\pm$ 0.001 | 0.238 $\pm$ 0.002 |
| 7   | 0.99 $\pm$ 0         | 0.231 $\pm$ 0     | 0.365 $\pm$ 0     | 0.996 $\pm$ 0.0           | 0.133 $\pm$ 0.008 | 0.259 $\pm$ 0.007 | 0.995 $\pm$ 0.0 | 0.128 $\pm$ 0.001 | 0.265 $\pm$ 0.003 |
| 8   | 0.987 $\pm$ 0        | 0.268 $\pm$ 0     | 0.413 $\pm$ 0     | 0.995 $\pm$ 0.0           | 0.153 $\pm$ 0.004 | 0.284 $\pm$ 0.004 | 0.995 $\pm$ 0.0 | 0.143 $\pm$ 0.001 | 0.288 $\pm$ 0.002 |
| 9   | 0.984 $\pm$ 0        | 0.306 $\pm$ 0     | 0.463 $\pm$ 0     | 0.994 $\pm$ 0.0           | 0.169 $\pm$ 0.003 | 0.312 $\pm$ 0.005 | 0.993 $\pm$ 0.0 | 0.161 $\pm$ 0.001 | 0.317 $\pm$ 0.002 |
| 10  | 0.98 $\pm$ 0         | 0.344 $\pm$ 0     | 0.513 $\pm$ 0     | 0.993 $\pm$ 0.0           | 0.186 $\pm$ 0.006 | 0.344 $\pm$ 0.006 | 0.992 $\pm$ 0.0 | 0.176 $\pm$ 0.001 | 0.346 $\pm$ 0.003 |
| 11  | 0.976 $\pm$ 0        | 0.382 $\pm$ 0     | 0.564 $\pm$ 0     | 0.991 $\pm$ 0.0           | 0.197 $\pm$ 0.004 | 0.372 $\pm$ 0.007 | 0.991 $\pm$ 0.0 | 0.19 $\pm$ 0.001  | 0.368 $\pm$ 0.003 |
| 12  | 0.972 $\pm$ 0        | 0.42 $\pm$ 0      | 0.615 $\pm$ 0     | 0.99 $\pm$ 0.001          | 0.214 $\pm$ 0.004 | 0.402 $\pm$ 0.009 | 0.99 $\pm$ 0.0  | 0.205 $\pm$ 0.001 | 0.396 $\pm$ 0.003 |
| 13  | 0.967 $\pm$ 0        | 0.459 $\pm$ 0     | 0.666 $\pm$ 0     | 0.989 $\pm$ 0.001         | 0.231 $\pm$ 0.006 | 0.416 $\pm$ 0.01  | 0.988 $\pm$ 0.0 | 0.224 $\pm$ 0.001 | 0.423 $\pm$ 0.004 |
| 14  | 0.961 $\pm$ 0        | 0.498 $\pm$ 0     | 0.719 $\pm$ 0     | 0.988 $\pm$ 0.0           | 0.244 $\pm$ 0.004 | 0.442 $\pm$ 0.007 | 0.986 $\pm$ 0.0 | 0.241 $\pm$ 0.001 | 0.456 $\pm$ 0.004 |
| 15  | 0.956 $\pm$ 0        | 0.537 $\pm$ 0     | 0.772 $\pm$ 0     | 0.987 $\pm$ 0.0           | 0.263 $\pm$ 0.005 | 0.466 $\pm$ 0.007 | 0.984 $\pm$ 0.0 | 0.262 $\pm$ 0.001 | 0.494 $\pm$ 0.003 |
| 16  | 0.949 $\pm$ 0        | 0.576 $\pm$ 0     | 0.825 $\pm$ 0     | 0.984 $\pm$ 0.0           | 0.284 $\pm$ 0.003 | 0.503 $\pm$ 0.006 | 0.983 $\pm$ 0.0 | 0.28 $\pm$ 0.002  | 0.521 $\pm$ 0.004 |
| 17  | 0.943 $\pm$ 0        | 0.616 $\pm$ 0     | 0.878 $\pm$ 0     | 0.982 $\pm$ 0.0           | 0.309 $\pm$ 0.004 | 0.542 $\pm$ 0.006 | 0.98 $\pm$ 0.0  | 0.303 $\pm$ 0.002 | 0.559 $\pm$ 0.004 |
| 18  | 0.936 $\pm$ 0        | 0.655 $\pm$ 0     | 0.931 $\pm$ 0     | 0.979 $\pm$ 0.0           | 0.336 $\pm$ 0.004 | 0.583 $\pm$ 0.006 | 0.976 $\pm$ 0.0 | 0.336 $\pm$ 0.002 | 0.621 $\pm$ 0.005 |
| 19  | 0.928 $\pm$ 0        | 0.694 $\pm$ 0     | 0.984 $\pm$ 0     | 0.974 $\pm$ 0.001         | 0.371 $\pm$ 0.003 | 0.643 $\pm$ 0.008 | 0.973 $\pm$ 0.0 | 0.358 $\pm$ 0.001 | 0.652 $\pm$ 0.003 |
| 20  | 0.921 $\pm$ 0        | 0.732 $\pm$ 0     | 1.037 $\pm$ 0     | 0.968 $\pm$ 0.001         | 0.398 $\pm$ 0.004 | 0.696 $\pm$ 0.01  | 0.969 $\pm$ 0.0 | 0.383 $\pm$ 0.001 | 0.695 $\pm$ 0.003 |
| 21  | 0.913 $\pm$ 0        | 0.77 $\pm$ 0      | 1.089 $\pm$ 0     | 0.969 $\pm$ 0.001         | 0.402 $\pm$ 0.004 | 0.702 $\pm$ 0.007 | 0.97 $\pm$ 0.0  | 0.384 $\pm$ 0.002 | 0.7 $\pm$ 0.004   |
| 22  | 0.904 $\pm$ 0        | 0.808 $\pm$ 0     | 1.141 $\pm$ 0     | 0.968 $\pm$ 0.001         | 0.415 $\pm$ 0.004 | 0.729 $\pm$ 0.012 | 0.968 $\pm$ 0.0 | 0.395 $\pm$ 0.001 | 0.723 $\pm$ 0.003 |
| 23  | 0.896 $\pm$ 0        | 0.846 $\pm$ 0     | 1.192 $\pm$ 0     | 0.966 $\pm$ 0.001         | 0.432 $\pm$ 0.005 | 0.756 $\pm$ 0.013 | 0.967 $\pm$ 0.0 | 0.41 $\pm$ 0.002  | 0.746 $\pm$ 0.004 |
| 24  | 0.888 $\pm$ 0        | 0.883 $\pm$ 0     | 1.242 $\pm$ 0     | 0.963 $\pm$ 0.001         | 0.451 $\pm$ 0.004 | 0.789 $\pm$ 0.008 | 0.965 $\pm$ 0.0 | 0.429 $\pm$ 0.002 | 0.78 $\pm$ 0.004  |
| 25  | 0.879 $\pm$ 0        | 0.92 $\pm$ 0      | 1.291 $\pm$ 0     | 0.961 $\pm$ 0.001         | 0.467 $\pm$ 0.004 | 0.82 $\pm$ 0.01   | 0.963 $\pm$ 0.0 | 0.445 $\pm$ 0.001 | 0.807 $\pm$ 0.002 |
| 26  | 0.87 $\pm$ 0         | 0.956 $\pm$ 0     | 1.34 $\pm$ 0      | 0.959 $\pm$ 0.001         | 0.487 $\pm$ 0.005 | 0.845 $\pm$ 0.01  | 0.96 $\pm$ 0.0  | 0.461 $\pm$ 0.002 | 0.834 $\pm$ 0.003 |
| 27  | 0.862 $\pm$ 0        | 0.992 $\pm$ 0     | 1.387 $\pm$ 0     | 0.957 $\pm$ 0.001         | 0.498 $\pm$ 0.006 | 0.87 $\pm$ 0.01   | 0.959 $\pm$ 0.0 | 0.471 $\pm$ 0.002 | 0.854 $\pm$ 0.003 |
| 28  | 0.853 $\pm$ 0        | 1.027 $\pm$ 0     | 1.434 $\pm$ 0     | 0.951 $\pm$ 0.001         | 0.529 $\pm$ 0.005 | 0.92 $\pm$ 0.01   | 0.956 $\pm$ 0.0 | 0.489 $\pm$ 0.002 | 0.883 $\pm$ 0.003 |
| 29  | 0.844 $\pm$ 0        | 1.062 $\pm$ 0     | 1.479 $\pm$ 0     | 0.951 $\pm$ 0.001         | 0.535 $\pm$ 0.005 | 0.924 $\pm$ 0.011 | 0.953 $\pm$ 0.0 | 0.504 $\pm$ 0.002 | 0.907 $\pm$ 0.004 |
| 30  | 0.836 $\pm$ 0        | 1.097 $\pm$ 0     | 1.524 $\pm$ 0     | 0.947 $\pm$ 0.001         | 0.556 $\pm$ 0.005 | 0.963 $\pm$ 0.01  | 0.95 $\pm$ 0.0  | 0.523 $\pm$ 0.001 | 0.933 $\pm$ 0.002 |
|     | Neural Network (MLP) |                   |                   | Ada Boost                 |                   |                   | XGBoost         |                   |                   |
| $d$ | $R^2$                | $MAE$             | $RMSE$            | $R^2$                     | $MAE$             | $RMSE$            | $R^2$           | $MAE$             | $RMSE$            |
| 1   | 0.999 $\pm$ 0.0      | 0.052 $\pm$ 0.005 | 0.137 $\pm$ 0.005 | 1.0 $\pm$ 0.0             | 0.016 $\pm$ 0.0   | 0.084 $\pm$ 0.002 | 0.999 $\pm$ 0   | 0.024 $\pm$ 0     | 0.112 $\pm$ 0     |
| 2   | 0.998 $\pm$ 0.0      | 0.076 $\pm$ 0.005 | 0.167 $\pm$ 0.003 | 0.999 $\pm$ 0.0           | 0.027 $\pm$ 0.0   | 0.137 $\pm$ 0.004 | 0.999 $\pm$ 0   | 0.036 $\pm$ 0     | 0.13 $\pm$ 0      |
| 3   | 0.997 $\pm$ 0.0      | 0.093 $\pm$ 0.006 | 0.191 $\pm$ 0.005 | 0.998 $\pm$ 0.0           | 0.038 $\pm$ 0.0   | 0.16 $\pm$ 0.002  | 0.998 $\pm$ 0   | 0.052 $\pm$ 0     | 0.158 $\pm$ 0     |
| 4   | 0.996 $\pm$ 0.0      | 0.114 $\pm$ 0.004 | 0.218 $\pm$ 0.004 | 0.998 $\pm$ 0.0           | 0.052 $\pm$ 0.001 | 0.176 $\pm$ 0.003 | 0.998 $\pm$ 0   | 0.069 $\pm$ 0     | 0.181 $\pm$ 0     |
| 5   | 0.995 $\pm$ 0.0      | 0.143 $\pm$ 0.005 | 0.254 $\pm$ 0.005 | 0.997 $\pm$ 0.0           | 0.067 $\pm$ 0.0   | 0.197 $\pm$ 0.004 | 0.998 $\pm$ 0   | 0.087 $\pm$ 0     | 0.197 $\pm$ 0     |
| 6   | 0.994 $\pm$ 0.0      | 0.159 $\pm$ 0.006 | 0.28 $\pm$ 0.006  | 0.996 $\pm$ 0.0           | 0.087 $\pm$ 0.001 | 0.239 $\pm$ 0.003 | 0.996 $\pm$ 0   | 0.105 $\pm$ 0     | 0.228 $\pm$ 0     |
| 7   | 0.992 $\pm$ 0.0      | 0.196 $\pm$ 0.005 | 0.324 $\pm$ 0.004 | 0.995 $\pm$ 0.0           | 0.105 $\pm$ 0.0   | 0.266 $\pm$ 0.003 | 0.995 $\pm$ 0   | 0.124 $\pm$ 0     | 0.265 $\pm$ 0     |
| 8   | 0.991 $\pm$ 0.0      | 0.215 $\pm$ 0.009 | 0.354 $\pm$ 0.009 | 0.994 $\pm$ 0.0           | 0.126 $\pm$ 0.001 | 0.298 $\pm$ 0.002 | 0.994 $\pm$ 0   | 0.142 $\pm$ 0     | 0.288 $\pm$ 0     |
| 9   | 0.991 $\pm$ 0.001    | 0.219 $\pm$ 0.012 | 0.368 $\pm$ 0.011 | 0.992 $\pm$ 0.0           | 0.141 $\pm$ 0.001 | 0.324 $\pm$ 0.002 | 0.993 $\pm$ 0   | 0.157 $\pm$ 0     | 0.315 $\pm$ 0     |
| 10  | 0.989 $\pm$ 0.001    | 0.237 $\pm$ 0.006 | 0.4 $\pm$ 0.012   | 0.991 $\pm$ 0.0           | 0.157 $\pm$ 0.001 | 0.364 $\pm$ 0.003 | 0.992 $\pm$ 0   | 0.173 $\pm$ 0     | 0.337 $\pm$ 0     |
| 11  | 0.987 $\pm$ 0.001    | 0.243 $\pm$ 0.007 | 0.425 $\pm$ 0.014 | 0.989 $\pm$ 0.0           | 0.176 $\pm$ 0.001 | 0.4 $\pm$ 0.003   | 0.991 $\pm$ 0   | 0.191 $\pm$ 0     | 0.375 $\pm$ 0     |
| 12  | 0.983 $\pm$ 0.001    | 0.249 $\pm$ 0.013 | 0.469 $\pm$ 0.017 | 0.987 $\pm$ 0.0           | 0.194 $\pm$ 0.001 | 0.432 $\pm$ 0.003 | 0.99 $\pm$ 0    | 0.206 $\pm$ 0     | 0.395 $\pm$ 0     |
| 13  | 0.983 $\pm$ 0.001    | 0.288 $\pm$ 0.01  | 0.493 $\pm$ 0.018 | 0.986 $\pm$ 0.0           | 0.211 $\pm$ 0.001 | 0.477 $\pm$ 0.01  | 0.989 $\pm$ 0   | 0.219 $\pm$ 0     | 0.415 $\pm$ 0     |
| 14  | 0.979 $\pm$ 0.001    | 0.298 $\pm$ 0.01  | 0.533 $\pm$ 0.014 | 0.984 $\pm$ 0.0           | 0.23 $\pm$ 0.001  | 0.493 $\pm$ 0.002 | 0.987 $\pm$ 0   | 0.24 $\pm$ 0      | 0.446 $\pm$ 0     |
| 15  | 0.979 $\pm$ 0.001    | 0.305 $\pm$ 0.007 | 0.534 $\pm$ 0.011 | 0.982 $\pm$ 0.0           | 0.247 $\pm$ 0.001 | 0.524 $\pm$ 0.003 | 0.985 $\pm$ 0   | 0.259 $\pm$ 0     | 0.481 $\pm$ 0     |
| 16  | 0.973 $\pm$ 0.001    | 0.342 $\pm$ 0.008 | 0.596 $\pm$ 0.012 | 0.98 $\pm$ 0.0            | 0.265 $\pm$ 0.001 | 0.552 $\pm$ 0.004 | 0.983 $\pm$ 0   | 0.279 $\pm$ 0     | 0.514 $\pm$ 0     |
| 17  | 0.972 $\pm$ 0.001    | 0.345 $\pm$ 0.009 | 0.614 $\pm$ 0.013 | 0.977 $\pm$ 0.0           | 0.283 $\pm$ 0.001 | 0.589 $\pm$ 0.004 | 0.981 $\pm$ 0   | 0.305 $\pm$ 0     | 0.556 $\pm$ 0     |
| 18  | 0.966 $\pm$ 0.001    | 0.382 $\pm$ 0.008 | 0.682 $\pm$ 0.015 | 0.972 $\pm$ 0.0           | 0.316 $\pm$ 0.001 | 0.657 $\pm$ 0.003 | 0.976 $\pm$ 0   | 0.34 $\pm$ 0      | 0.615 $\pm$ 0     |
| 19  | 0.964 $\pm$ 0.001    | 0.406 $\pm$ 0.007 | 0.711 $\pm$ 0.013 | 0.969 $\pm$ 0.0           | 0.342 $\pm$ 0.001 | 0.697 $\pm$ 0.003 | 0.973 $\pm$ 0   | 0.361 $\pm$ 0     | 0.65 $\pm$ 0      |
| 20  | 0.963 $\pm$ 0.001    | 0.426 $\pm$ 0.006 | 0.728 $\pm$ 0.013 | 0.963 $\pm$ 0.001         | 0.373 $\pm$ 0.002 | 0.745 $\pm$ 0.005 | 0.967 $\pm$ 0   | 0.394 $\pm$ 0     | 0.71 $\pm$ 0      |
| 21  | 0.964 $\pm$ 0.001    | 0.437 $\pm$ 0.005 | 0.739 $\pm$ 0.01  | 0.963 $\pm$ 0.001         | 0.375 $\pm$ 0.001 | 0.765 $\pm$ 0.005 | 0.967 $\pm$ 0   | 0.395 $\pm$ 0     | 0.711 $\pm$ 0     |
| 22  | 0.963 $\pm$ 0.001    | 0.446 $\pm$ 0.008 | 0.763 $\pm$ 0.009 | 0.961 $\pm$ 0.001         | 0.387 $\pm$ 0.002 | 0.788 $\pm$ 0.006 | 0.966 $\pm$ 0   | 0.406 $\pm$ 0     | 0.737 $\pm$ 0     |
| 23  | 0.962 $\pm$ 0.001    | 0.472 $\pm$ 0.011 | 0.783 $\pm$ 0.015 | 0.961 $\pm$ 0.0           | 0.392 $\pm$ 0.002 | 0.797 $\pm$ 0.004 | 0.964 $\pm$ 0   | 0.422 $\pm$ 0     | 0.766 $\pm$ 0     |
| 24  | 0.96 $\pm$ 0.001     | 0.474 $\pm$ 0.009 | 0.809 $\pm$ 0.008 | 0.957 $\pm$ 0.0           | 0.421 $\pm$ 0.002 | 0.85 $\pm$ 0.005  | 0.962 $\pm$ 0   | 0.435 $\pm$ 0     | 0.796 $\pm$ 0     |
| 25  | 0.958 $\pm$ 0.001    | 0.495 $\pm$ 0.01  | 0.84 $\pm$ 0.014  | 0.957 $\pm$ 0.001         | 0.436 $\pm$ 0.002 | 0.872 $\pm$ 0.007 | 0.959 $\pm$ 0   | 0.457 $\pm$ 0     | 0.832 $\pm$ 0     |
| 26  | 0.958 $\pm$ 0.001    | 0.5 $\pm$ 0.01    | 0.849 $\pm$ 0.009 | 0.954 $\pm$ 0.001         | 0.458 $\pm$ 0.002 | 0.915 $\pm$ 0.007 | 0.956 $\pm$ 0   | 0.48 $\pm$ 0      | 0.879 $\pm$ 0     |
| 27  | 0.955 $\pm$ 0.001    | 0.544 $\pm$ 0.012 | 0.881 $\pm$ 0.012 | 0.951 $\pm$ 0.001         | 0.474 $\pm$ 0.002 | 0.947 $\pm$ 0.005 | 0.955 $\pm$ 0   | 0.49 $\pm$ 0      | 0.896 $\pm$ 0     |
| 28  | 0.952 $\pm$ 0.002    | 0.555 $\pm$ 0.014 | 0.918 $\pm$ 0.016 | 0.946 $\pm$ 0.001         | 0.492 $\pm$ 0.002 | 0.995 $\pm$ 0.004 | 0.951 $\pm$ 0   | 0.507 $\pm$ 0     | 0.927 $\pm$ 0     |
| 29  | 0.952 $\pm$ 0.001    | 0.565 $\pm$ 0.016 | 0.92 $\pm$ 0.016  | 0.942 $\pm$ 0.001         | 0.515 $\pm$ 0.002 | 1.024 $\pm$ 0.    |                 |                   |                   |

| Hist Based Gradient Boost |               |                |                | Random Forest |                |                | Neural Network (MLP) |                |                |
|---------------------------|---------------|----------------|----------------|---------------|----------------|----------------|----------------------|----------------|----------------|
| <i>size</i>               | $R^2$         | <i>MAE</i>     | <i>RMSE</i>    | $R^2$         | <i>MAE</i>     | <i>RMSE</i>    | $R^2$                | <i>MAE</i>     | <i>RMSE</i>    |
| 5000                      | 0.918 ± 0.002 | 18.589 ± 0.172 | 32.593 ± 0.363 | 0.93 ± 0.001  | 17.591 ± 0.093 | 30.468 ± 0.146 | 0.911 ± 0.006        | 19.708 ± 1.566 | 34.443 ± 1.042 |
| 20000                     | 0.945 ± 0.001 | 14.624 ± 0.095 | 26.284 ± 0.14  | 0.956 ± 0.0   | 12.465 ± 0.033 | 23.71 ± 0.051  | 0.945 ± 0.001        | 14.121 ± 0.552 | 26.358 ± 0.167 |
| 35000                     | 0.952 ± 0.001 | 13.723 ± 0.06  | 24.542 ± 0.118 | 0.962 ± 0.0   | 11.311 ± 0.019 | 22.155 ± 0.037 | 0.953 ± 0.002        | 12.677 ± 0.974 | 24.494 ± 0.6   |
| 50000                     | 0.957 ± 0.001 | 13.171 ± 0.068 | 23.557 ± 0.111 | 0.965 ± 0.0   | 10.657 ± 0.023 | 21.262 ± 0.039 | 0.957 ± 0.001        | 11.857 ± 0.573 | 23.394 ± 0.226 |
| 65000                     | 0.959 ± 0.0   | 12.906 ± 0.059 | 22.993 ± 0.095 | 0.967 ± 0.0   | 10.291 ± 0.018 | 20.759 ± 0.028 | 0.959 ± 0.0          | 11.44 ± 0.125  | 22.836 ± 0.087 |
| 80000                     | 0.96 ± 0.0    | 12.774 ± 0.047 | 22.756 ± 0.072 | 0.967 ± 0.0   | 10.078 ± 0.019 | 20.574 ± 0.021 | 0.96 ± 0.0           | 11.312 ± 0.157 | 22.519 ± 0.082 |
| 95000                     | 0.961 ± 0.0   | 12.594 ± 0.035 | 22.509 ± 0.073 | 0.969 ± 0.0   | 9.831 ± 0.013  | 20.24 ± 0.024  | 0.961 ± 0.0          | 11.079 ± 0.119 | 22.465 ± 0.077 |
| 110000                    | 0.962 ± 0.0   | 12.415 ± 0.029 | 22.134 ± 0.057 | 0.97 ± 0.0    | 9.591 ± 0.014  | 19.918 ± 0.021 | 0.962 ± 0.0          | 10.932 ± 0.118 | 21.965 ± 0.09  |
| 125000                    | 0.963 ± 0.0   | 12.352 ± 0.041 | 21.974 ± 0.084 | 0.97 ± 0.0    | 9.405 ± 0.016  | 19.682 ± 0.026 | 0.963 ± 0.0          | 10.788 ± 0.138 | 21.714 ± 0.109 |
| 140000                    | 0.964 ± 0.0   | 12.174 ± 0.047 | 21.646 ± 0.063 | 0.971 ± 0.0   | 9.3 ± 0.019    | 19.516 ± 0.029 | 0.965 ± 0.0          | 10.535 ± 0.076 | 21.215 ± 0.126 |
| 155000                    | 0.965 ± 0.0   | 12.016 ± 0.048 | 21.498 ± 0.088 | 0.971 ± 0.0   | 9.191 ± 0.017  | 19.436 ± 0.026 | 0.965 ± 0.0          | 10.294 ± 0.099 | 21.233 ± 0.085 |
| 170000                    | 0.965 ± 0.0   | 11.916 ± 0.052 | 21.366 ± 0.082 | 0.972 ± 0.0   | 9.063 ± 0.015  | 19.266 ± 0.02  | 0.966 ± 0.001        | 10.334 ± 0.175 | 21.039 ± 0.144 |

| Ada Boost   |               |                | XGBoost        |           |            |             |
|-------------|---------------|----------------|----------------|-----------|------------|-------------|
| <i>size</i> | $R^2$         | <i>MAE</i>     | <i>RMSE</i>    | $R^2$     | <i>MAE</i> | <i>RMSE</i> |
| 5000        | 0.909 ± 0.004 | 15.754 ± 0.309 | 34.84 ± 0.752  | 0.922 ± 0 | 17.602 ± 0 | 31.665 ± 0  |
| 20000       | 0.942 ± 0.001 | 11.398 ± 0.077 | 27.29 ± 0.246  | 0.951 ± 0 | 13.148 ± 0 | 24.988 ± 0  |
| 35000       | 0.952 ± 0.001 | 10.306 ± 0.031 | 24.871 ± 0.094 | 0.958 ± 0 | 12.083 ± 0 | 23.262 ± 0  |
| 50000       | 0.957 ± 0.001 | 9.698 ± 0.054  | 23.349 ± 0.115 | 0.962 ± 0 | 11.474 ± 0 | 22.241 ± 0  |
| 65000       | 0.96 ± 0.001  | 9.458 ± 0.027  | 22.579 ± 0.084 | 0.964 ± 0 | 11.105 ± 0 | 21.52 ± 0   |
| 80000       | 0.961 ± 0.001 | 9.367 ± 0.037  | 22.29 ± 0.118  | 0.965 ± 0 | 10.984 ± 0 | 21.427 ± 0  |
| 95000       | 0.962 ± 0.0   | 9.23 ± 0.023   | 21.86 ± 0.064  | 0.966 ± 0 | 10.778 ± 0 | 21.061 ± 0  |
| 110000      | 0.964 ± 0.0   | 9.037 ± 0.015  | 21.367 ± 0.053 | 0.967 ± 0 | 10.544 ± 0 | 20.697 ± 0  |
| 125000      | 0.965 ± 0.0   | 8.946 ± 0.024  | 20.976 ± 0.056 | 0.968 ± 0 | 10.414 ± 0 | 20.471 ± 0  |
| 140000      | 0.966 ± 0.0   | 8.879 ± 0.026  | 20.728 ± 0.05  | 0.966 ± 0 | 10.028 ± 0 | 20.803 ± 0  |
| 155000      | 0.967 ± 0.0   | 8.897 ± 0.014  | 20.684 ± 0.031 | 0.967 ± 0 | 9.929 ± 0  | 20.737 ± 0  |
| 170000      | 0.968 ± 0.0   | 8.857 ± 0.021  | 20.431 ± 0.051 | 0.967 ± 0 | 9.84 ± 0   | 20.543 ± 0  |

**Table S5.** These values corresponds to the experiments presented in Figure 5 (Environment 1)

|             | Hist Based Gradient Boost |                |                | Random Forest |                |                | Neural Network (MLP) |                |                |
|-------------|---------------------------|----------------|----------------|---------------|----------------|----------------|----------------------|----------------|----------------|
| <i>size</i> | $R^2$                     | <i>MAE</i>     | <i>RMSE</i>    | $R^2$         | <i>MAE</i>     | <i>RMSE</i>    | $R^2$                | <i>MAE</i>     | <i>RMSE</i>    |
| 5000        | 0.78 ± 0.002              | 34.173 ± 0.191 | 49.319 ± 0.31  | 0.816 ± 0.001 | 32.132 ± 0.084 | 45.167 ± 0.099 | 0.8 ± 0.004          | 34.104 ± 0.976 | 47.753 ± 0.819 |
| 20000       | 0.829 ± 0.001             | 29.231 ± 0.1   | 43.265 ± 0.133 | 0.851 ± 0.0   | 26.879 ± 0.035 | 40.199 ± 0.028 | 0.832 ± 0.004        | 29.052 ± 0.532 | 42.508 ± 0.428 |
| 35000       | 0.843 ± 0.001             | 27.971 ± 0.057 | 41.365 ± 0.072 | 0.862 ± 0.0   | 25.502 ± 0.04  | 38.74 ± 0.037  | 0.844 ± 0.002        | 27.715 ± 0.606 | 41.141 ± 0.287 |
| 50000       | 0.849 ± 0.001             | 27.39 ± 0.055  | 40.514 ± 0.085 | 0.867 ± 0.0   | 24.73 ± 0.031  | 38.011 ± 0.03  | 0.851 ± 0.002        | 27.171 ± 0.477 | 40.188 ± 0.288 |
| 65000       | 0.857 ± 0.001             | 26.772 ± 0.056 | 39.511 ± 0.08  | 0.872 ± 0.0   | 24.26 ± 0.022  | 37.467 ± 0.024 | 0.855 ± 0.004        | 26.729 ± 0.834 | 39.582 ± 0.589 |
| 80000       | 0.859 ± 0.001             | 26.578 ± 0.051 | 39.243 ± 0.063 | 0.873 ± 0.0   | 23.982 ± 0.026 | 37.237 ± 0.025 | 0.859 ± 0.001        | 26.234 ± 0.256 | 39.152 ± 0.161 |
| 95000       | 0.861 ± 0.001             | 26.349 ± 0.045 | 38.907 ± 0.059 | 0.875 ± 0.0   | 23.672 ± 0.018 | 36.912 ± 0.017 | 0.859 ± 0.001        | 26.242 ± 0.108 | 39.145 ± 0.086 |
| 110000      | 0.864 ± 0.001             | 26.044 ± 0.044 | 38.509 ± 0.057 | 0.877 ± 0.0   | 23.401 ± 0.019 | 36.627 ± 0.018 | 0.861 ± 0.001        | 25.882 ± 0.11  | 38.85 ± 0.086  |
| 125000      | 0.866 ± 0.0               | 25.924 ± 0.057 | 38.31 ± 0.066  | 0.878 ± 0.0   | 23.201 ± 0.016 | 36.45 ± 0.014  | 0.862 ± 0.001        | 25.773 ± 0.143 | 38.727 ± 0.094 |
| 140000      | 0.867 ± 0.001             | 25.778 ± 0.054 | 38.144 ± 0.058 | 0.88 ± 0.0    | 23.057 ± 0.018 | 36.284 ± 0.016 | 0.862 ± 0.001        | 25.656 ± 0.136 | 38.599 ± 0.1   |
| 155000      | 0.868 ± 0.0               | 25.636 ± 0.052 | 37.897 ± 0.06  | 0.88 ± 0.0    | 22.945 ± 0.012 | 36.171 ± 0.016 | 0.864 ± 0.001        | 25.462 ± 0.18  | 38.338 ± 0.104 |
| 170000      | 0.869 ± 0.0               | 25.565 ± 0.049 | 37.805 ± 0.058 | 0.882 ± 0.0   | 22.818 ± 0.02  | 36.013 ± 0.019 | 0.865 ± 0.001        | 25.335 ± 0.17  | 38.25 ± 0.123  |

|             | Ada Boost     |                |                | XGBoost   |            |             |
|-------------|---------------|----------------|----------------|-----------|------------|-------------|
| <i>size</i> | $R^2$         | <i>MAE</i>     | <i>RMSE</i>    | $R^2$     | <i>MAE</i> | <i>RMSE</i> |
| 5000        | 0.738 ± 0.002 | 34.625 ± 0.115 | 55.998 ± 0.194 | 0.786 ± 0 | 33.627 ± 0 | 48.922 ± 0  |
| 20000       | 0.806 ± 0.001 | 27.587 ± 0.073 | 46.731 ± 0.126 | 0.835 ± 0 | 28.348 ± 0 | 42.554 ± 0  |
| 35000       | 0.826 ± 0.001 | 26.139 ± 0.039 | 44.241 ± 0.075 | 0.85 ± 0  | 26.94 ± 0  | 40.489 ± 0  |
| 50000       | 0.84 ± 0.001  | 25.164 ± 0.036 | 42.108 ± 0.078 | 0.857 ± 0 | 26.283 ± 0 | 39.524 ± 0  |
| 65000       | 0.849 ± 0.0   | 24.578 ± 0.029 | 40.828 ± 0.053 | 0.863 ± 0 | 25.709 ± 0 | 38.698 ± 0  |
| 80000       | 0.852 ± 0.0   | 24.443 ± 0.026 | 40.343 ± 0.045 | 0.866 ± 0 | 25.465 ± 0 | 38.393 ± 0  |
| 95000       | 0.855 ± 0.0   | 24.189 ± 0.022 | 39.713 ± 0.041 | 0.869 ± 0 | 25.192 ± 0 | 37.984 ± 0  |
| 110000      | 0.859 ± 0.0   | 23.959 ± 0.018 | 39.253 ± 0.03  | 0.87 ± 0  | 24.906 ± 0 | 37.699 ± 0  |
| 125000      | 0.862 ± 0.0   | 23.754 ± 0.018 | 38.749 ± 0.032 | 0.873 ± 0 | 24.634 ± 0 | 37.358 ± 0  |
| 140000      | 0.864 ± 0.0   | 23.654 ± 0.016 | 38.509 ± 0.026 | 0.865 ± 0 | 24.388 ± 0 | 38.259 ± 0  |
| 155000      | 0.866 ± 0.0   | 23.566 ± 0.018 | 38.183 ± 0.035 | 0.867 ± 0 | 24.244 ± 0 | 38.038 ± 0  |
| 170000      | 0.868 ± 0.0   | 23.404 ± 0.024 | 37.806 ± 0.04  | 0.868 ± 0 | 24.114 ± 0 | 37.86 ± 0   |

**Table S6.** These values corresponds to the experiments presented in Figure 5 (Environment 2)

| size   | Hist Based Gradient Boost |                |                | Random Forest |                |                | Neural Network (MLP) |                |                |
|--------|---------------------------|----------------|----------------|---------------|----------------|----------------|----------------------|----------------|----------------|
|        | $R^2$                     | MAE            | RMSE           | $R^2$         | MAE            | RMSE           | $R^2$                | MAE            | RMSE           |
| 5000   | 0.826 ± 0.003             | 27.501 ± 0.285 | 42.009 ± 0.327 | 0.849 ± 0.001 | 26.229 ± 0.097 | 39.266 ± 0.07  | 0.824 ± 0.005        | 27.735 ± 0.441 | 42.525 ± 0.616 |
| 20000  | 0.854 ± 0.001             | 24.133 ± 0.133 | 38.637 ± 0.168 | 0.874 ± 0.0   | 21.838 ± 0.054 | 35.712 ± 0.038 | 0.854 ± 0.003        | 24.711 ± 0.447 | 38.793 ± 0.464 |
| 35000  | 0.865 ± 0.001             | 23.1 ± 0.058   | 36.901 ± 0.066 | 0.882 ± 0.0   | 20.728 ± 0.046 | 34.433 ± 0.02  | 0.86 ± 0.002         | 24.577 ± 0.482 | 37.447 ± 0.308 |
| 50000  | 0.871 ± 0.001             | 22.606 ± 0.118 | 36.122 ± 0.112 | 0.887 ± 0.0   | 20.074 ± 0.065 | 33.79 ± 0.031  | 0.866 ± 0.002        | 23.652 ± 0.431 | 36.754 ± 0.248 |
| 65000  | 0.877 ± 0.0               | 22.004 ± 0.056 | 35.221 ± 0.071 | 0.891 ± 0.0   | 19.538 ± 0.037 | 33.19 ± 0.027  | 0.868 ± 0.002        | 23.59 ± 0.355  | 36.487 ± 0.25  |
| 80000  | 0.881 ± 0.0               | 21.791 ± 0.064 | 34.747 ± 0.062 | 0.894 ± 0.0   | 19.106 ± 0.028 | 32.76 ± 0.017  | 0.872 ± 0.001        | 22.516 ± 0.446 | 35.658 ± 0.241 |
| 95000  | 0.883 ± 0.001             | 21.683 ± 0.061 | 34.583 ± 0.074 | 0.896 ± 0.0   | 18.862 ± 0.028 | 32.545 ± 0.016 | 0.874 ± 0.001        | 22.091 ± 0.341 | 35.597 ± 0.247 |
| 110000 | 0.886 ± 0.0               | 21.258 ± 0.072 | 34.095 ± 0.073 | 0.898 ± 0.0   | 18.518 ± 0.028 | 32.179 ± 0.016 | 0.874 ± 0.001        | 22.365 ± 0.336 | 35.526 ± 0.221 |
| 125000 | 0.887 ± 0.001             | 21.114 ± 0.065 | 33.848 ± 0.066 | 0.9 ± 0.0     | 18.309 ± 0.03  | 31.98 ± 0.02   | 0.877 ± 0.001        | 21.327 ± 0.418 | 34.934 ± 0.224 |
| 140000 | 0.888 ± 0.0               | 21.01 ± 0.05   | 33.676 ± 0.059 | 0.901 ± 0.0   | 18.137 ± 0.025 | 31.788 ± 0.017 | 0.878 ± 0.002        | 21.737 ± 0.617 | 35.061 ± 0.218 |
| 155000 | 0.89 ± 0.0                | 20.988 ± 0.054 | 33.536 ± 0.066 | 0.902 ± 0.0   | 18.041 ± 0.033 | 31.656 ± 0.019 | 0.881 ± 0.002        | 20.279 ± 0.54  | 34.546 ± 0.253 |
| 170000 | 0.89 ± 0.0                | 20.84 ± 0.06   | 33.405 ± 0.052 | 0.903 ± 0.0   | 17.846 ± 0.03  | 31.507 ± 0.017 | 0.883 ± 0.001        | 20.072 ± 0.322 | 34.314 ± 0.171 |

  

| size   | Ada Boost     |                |                | XGBoost   |            |            |
|--------|---------------|----------------|----------------|-----------|------------|------------|
|        | $R^2$         | MAE            | RMSE           | $R^2$     | MAE        | RMSE       |
| 5000   | 0.744 ± 0.002 | 29.962 ± 0.116 | 52.883 ± 0.196 | 0.816 ± 0 | 28.494 ± 0 | 43.39 ± 0  |
| 20000  | 0.817 ± 0.001 | 23.824 ± 0.067 | 44.363 ± 0.119 | 0.853 ± 0 | 23.971 ± 0 | 38.86 ± 0  |
| 35000  | 0.834 ± 0.001 | 23.082 ± 0.057 | 41.99 ± 0.129  | 0.867 ± 0 | 22.72 ± 0  | 36.739 ± 0 |
| 50000  | 0.844 ± 0.001 | 22.387 ± 0.039 | 40.697 ± 0.069 | 0.874 ± 0 | 21.924 ± 0 | 35.768 ± 0 |
| 65000  | 0.853 ± 0.0   | 21.797 ± 0.028 | 39.334 ± 0.054 | 0.88 ± 0  | 21.344 ± 0 | 34.919 ± 0 |
| 80000  | 0.859 ± 0.001 | 21.535 ± 0.045 | 38.433 ± 0.071 | 0.885 ± 0 | 20.884 ± 0 | 34.243 ± 0 |
| 95000  | 0.864 ± 0.0   | 21.234 ± 0.035 | 37.772 ± 0.047 | 0.887 ± 0 | 20.669 ± 0 | 34.008 ± 0 |
| 110000 | 0.868 ± 0.0   | 20.945 ± 0.034 | 37.141 ± 0.059 | 0.89 ± 0  | 20.324 ± 0 | 33.591 ± 0 |
| 125000 | 0.869 ± 0.0   | 21.061 ± 0.033 | 37.058 ± 0.048 | 0.892 ± 0 | 20.09 ± 0  | 33.287 ± 0 |
| 140000 | 0.87 ± 0.0    | 21.015 ± 0.031 | 36.766 ± 0.05  | 0.888 ± 0 | 19.546 ± 0 | 33.671 ± 0 |
| 155000 | 0.872 ± 0.0   | 21.005 ± 0.025 | 36.528 ± 0.043 | 0.89 ± 0  | 19.446 ± 0 | 33.471 ± 0 |
| 170000 | 0.873 ± 0.0   | 21.019 ± 0.033 | 36.414 ± 0.054 | 0.891 ± 0 | 19.294 ± 0 | 33.287 ± 0 |

**Table S7.** These values corresponds to the experiments presented in Figure 5 (Environment 3)

| Hyperparameter           | Value                     | Description                                                                                                                                                |
|--------------------------|---------------------------|------------------------------------------------------------------------------------------------------------------------------------------------------------|
| bootstrap                | True                      | Whether bootstrap samples are used when building trees. If False, the whole dataset is used to build each tree.                                            |
| ccp_alpha                | 0 (default)               | Complexity parameter used for Minimal Cost-Complexity Pruning.                                                                                             |
| criterion                | "squared_error" (default) | The function to measure the quality of a split.                                                                                                            |
| max_depth                | None (default)            | The maximum depth of the tree. If None, then nodes are expanded until all leaves are pure or until all leaves contain less than min_samples_split_samples. |
| max_features             | "sqrt"                    | The number of features to consider when looking for the best split.                                                                                        |
| max_leaf_nodes           | None (default)            | Grow trees with max_leaf_nodes in best-first fashion.                                                                                                      |
| max_samples              | None (default)            | If bootstrap is True, the number of samples to draw from the dataset to train each base estimator.                                                         |
| min_impurity_decrease    | 0 (default)               | A node will be split if this split induces a decrease of the impurity greater than or equal to this value.                                                 |
| min_samples_leaf         | 1 (default)               | The minimum number of samples required to be at a leaf node.                                                                                               |
| min_samples_split        | 6                         | The minimum number of samples required to split an internal node.                                                                                          |
| min_weight_fraction_leaf | 0 (default)               | The minimum weighted fraction of the sum total of weights (of all the input samples) required to be at a leaf node.                                        |
| n_estimators             | 100 (default)             | The number of trees in the forest.                                                                                                                         |
| oob_score                | False (default)           | Whether to use out-of-bag samples to estimate the generalization score.                                                                                    |

**Table S8.** Tunned hyperparameters of *RandomForestRegressor* component, implemented by *scikit-learn*.



| Hyperparameter | Value                 | Description                                                                       |
|----------------|-----------------------|-----------------------------------------------------------------------------------|
| base_estimator | DecisionTreeRegressor | The base estimator from which the boosted ensemble is built.                      |
| learning_rate  | 0.1                   | Weight applied to each regressor at each boosting iteration.                      |
| loss           | "linear"              | The loss function to use when updating the weights after each boosting iteration. |
| n_estimators   | 50                    | The maximum number of estimators at which boosting is terminated.                 |

**Table S9.** Tunned hyperparameters of *AdaBoostRegressor* component, implemented by *scikit-learn*. In the Table 10 are defined the hyperparameters used by *DecisionTreeRegressor*, also implemented by *scikit-learn*.

| Hyperparameter           | Value                     | Description                                                                                                         |
|--------------------------|---------------------------|---------------------------------------------------------------------------------------------------------------------|
| ccp_alpha                | 0 (default)               | Complexity parameter used for Minimal Cost-Complexity Pruning.                                                      |
| criterion                | "squared_error" (default) | The function to measure the quality of a split.                                                                     |
| max_depth                | 18                        | The maximum depth of the tree.                                                                                      |
| max_features             | None (default)            | The number of features to consider when looking for the best split.                                                 |
| max_leaf_nodes           | None (default)            | Grow trees with max_leaf_nodes in best-first fashion.                                                               |
| min_impurity_decrease    | 0 (default)               | A node will be split if this split induces a decrease of the impurity greater than or equal to this value.          |
| min_samples_leaf         | 1 (default)               | The minimum number of samples required to be at a leaf node.                                                        |
| min_samples_split        | 14                        | The minimum number of samples required to split an internal node.                                                   |
| min_weight_fraction_leaf | 0 (default)               | The minimum weighted fraction of the sum total of weights (of all the input samples) required to be at a leaf node. |
| splitter                 | "best" (default)          | The strategy used to choose the split at each node.                                                                 |

**Table S10.** Tunned hyperparameters of *DecisionTreeRegressor* component, implemented by *scikit-learn*.



| Hyperparameter    | Value                 | Description                                                                                                                          |
|-------------------|-----------------------|--------------------------------------------------------------------------------------------------------------------------------------|
| alpha             | 1 (default)           | L1 regularization term on weights.                                                                                                   |
| colsample_bytree  | 1 (default)           | The subsample ratio of columns when constructing each tree.                                                                          |
| colsample_bylevel | 1 (default)           | The subsample ratio of columns for each level.                                                                                       |
| colsample_bynode  | 1 (default)           | The subsample ratio of columns for each node (split).                                                                                |
| grow_policy       | "depthwise" (default) | Controls a way new nodes are added to the tree. If "depthwise", splits at nodes closest to the root.                                 |
| lambda            | 1 (default)           | L2 regularization term on weights.                                                                                                   |
| learning_rate     | 0.1                   | Step size shrinkage used in update to prevents overfitting.                                                                          |
| max_depth         | 12                    | The Maximum depth of a tree.                                                                                                         |
| max_delta_step    | 0 (default)           | Maximum delta step allowed each leaf output to be.                                                                                   |
| max_leaver        | 0 (default)           | Maximum number of nodes to be added.                                                                                                 |
| min_child_weight  | 1 (default)           | Minimum sum of instance weight needed in a child.                                                                                    |
| min_split_loss    | 0 (default)           | Minimum loss reduction required to make a further partition on a leaf node of the tree.                                              |
| n_estimators      | 400                   | Number of gradient boosted trees.                                                                                                    |
| process_type      | "default" (default)   | A type of boosting process to run. If "default", creates new trees (the normal boosting process).                                    |
| refresh_leaf      | 1 (default)           | When this flag is 1, tree leafs as well as tree nodes' stats are updated. When it is 0, only node stats are updated.                 |
| sampling_method   | "uniform" (default)   | The method to use to sample the training instances. If "uniform", each training instance has an equal probability of being selected. |
| scale_pos_weight  | 1 (default)           | Control the balance of positive and negative weights, useful for unbalanced classes.                                                 |
| subsample         | 0.1                   | The subsample ratio of the training instances.                                                                                       |
| tree_method       | "auto" (default)      | The tree construction algorithm used in XGBoost. If auto, uses heuristic to choose the fastest method.                               |

**Table S11.** Tunned hyperparameters for *XGBRegressor* component, implemented by *xgboost*.

| Hyperparameter       | Value            | Description                                                                                                                                             |
|----------------------|------------------|---------------------------------------------------------------------------------------------------------------------------------------------------------|
| categorical_features | None (default)   | Indicates the categorical features. If None, no feature will be considered categorical.                                                                 |
| early_stopping       | "auto" (default) | If "auto", early stopping is enabled if the sample size is larger than 10000. If True, early stopping is enabled, otherwise early stopping is disabled. |
| learning_rate        | 0.3              | The learning rate, also known as shrinkage.                                                                                                             |
| loss                 | "squared_error"  | The loss function to use in the boosting process.                                                                                                       |
| l2_regularization    | 0 (default)      | The L2 regularization parameter.                                                                                                                        |
| max_bins             | 100              | The maximum number of bins to use for non-missing values.                                                                                               |
| max_depth            | None (default)   | The maximum number of iterations of the boosting process.                                                                                               |
| max_iter             | 1000             | The maximum number of iterations of the boosting process.                                                                                               |
| max_leaf_nodes       | 31 (default)     | The maximum number of leaves for each tree.                                                                                                             |
| min_samples_nodes    | 20 (default)     | The minimum number of samples per leaf.                                                                                                                 |
| monotonic_cst        | None (default)   | Indicates the monotonic constraint to enforce on each feature.                                                                                          |
| n_iter_no_change     | 10 (default)     | Used to determine when to early stop.                                                                                                                   |
| quantile             | None (default)   | If loss is "quantile", this parameter specifies which quantile to be estimated and must be between 0 and 1.                                             |
| scoring              | "loss" (default) | Scoring parameter to use for early stopping.                                                                                                            |
| tol                  | 1e-7             | The absolute tolerance to use when comparing scores during early stopping.                                                                              |
| validation_fraction  | 0.1 (default)    | Proportion (or absolute size) of training data to set aside as validation data for early stopping.                                                      |

**Table S12.** Tunned hyperparameters of *HistGradientBoostingRegressor* component, implemented by *scikit-learn*.
